# Supplementary material
Source: PubMed Central journal article supplement (PMC4547212)
Supplement: pnas.1421372112.sapp.pdf [file pnas.1421372112.sapp.pdf]

## **SUPPORTING INFORMATION APPENDIX**

### **Mitochondrial Genomes are Retained by Selective Constraints on Protein Targeting**

**Patrik Björkholm#, Ajith Harish#, Erik Hagström, Andreas M. Ernst, Siv G.E. Andersson\***

|                                  |                    |
|----------------------------------|--------------------|
| <b>Supporting methods:</b>       | <b>pages 1-7</b>   |
| <b>Supporting figures S1-S4:</b> | <b>pages 9-11</b>  |
| <b>Supporting tables S1-S8:</b>  | <b>pages 12-33</b> |
| <b>Supporting references</b>     | <b>page 34</b>     |

## **Materials and methods**

### **Mitochondrial respiratory chain dataset**

Proteins in the human mitochondrial respiratory chain were identified and downloaded from the HUGO nomenclature Committee webpage (1). Proteins in the yeast mitochondrial respiratory chain were downloaded from NCBI Organelle Genome Resource (<http://www.ncbi.nlm.nih.gov/genomes/GenomesHome.cgi?taxid=2759&hopt=html>).

### **Mitochondrial structure dataset**

All membrane structures from the OPM web-resource that were annotated as mitochondrial (inner membrane) and that contained trans-membrane components were downloaded as Fasta sequences (2). Only proteins showing to have a transmembrane region were kept.

### **Human and yeast mitochondrial GFP-dataset**

Yeast and human proteins localized to mitochondria with the aid of GFP were downloaded from Mitominer (<http://mitominer.mrc-mbu.cam.ac.uk/release-3.1/begin.do>) (9). We only kept proteins for which hydrophobic segments were identified and annotated or published as mitochondrial proteins in Uniprot.

### **Chloroplast photosynthetic dataset**

Photosynthetic proteins were identified using the KEGG resource (3) and linked to Uniprot where their sequences were downloaded. If multiple identifiers were available the first reviewed protein in the list was selected (4).

### **Alphaproteobacterial and cyanobacterial datasets**

Respiratory chain proteins from *Rickettsia prowazekii* (strain Madrid E) were downloaded from Uniprot. Bacterial homologs of two genes from the respiratory chain complex (*cox1* and *cytb*) and two photosynthetic genes (*psaA* and *psbB*) were identified and downloaded using uniprot families (4). Cox1 and CytB protein sequences were downloaded from the following species: *Paracoccus denitrificans*, *Bradyrhizobium diazoefficiens*, *Brucella suis*, *Magnetospirillum magneticum*, *Rickettsia prowazeki*, *Chlamydomonas reinhardtii*,

*Caenorhabditis elegans*, *Danio rerio*, *Drosophila melanogaster*, *Gallus Gallus*, *Canis familiaris*, *Bos Taurus* and *Arabidopsis thaliana*. PsaA and PsbB protein sequences were downloaded from the following species: *Acaryochloris marina*, *Nostoc sp.*, *Synechococcus elongatus*, *Anabaena variabilis*, *Gloeobacter violaceus*, *Oryza sativa*, *Populus alba*, *Vitis vinifera*, *Conocephalum conicum* and *Zea mays*.

### **Prediction of the hydrophobicity of transmembrane domains**

Transmembrane domains were predicted and their hydrophobicity was calculated using DGpred (6), which provides a score that is based on hydrophobicity for each transmembrane domain. This score represents the free energy of membrane insertion for that specific TMD (kcal/mol) and normally ranges between +3 and -3. The boundary for SRP-recognition of a transmembrane domain has been approximated to zero and increases in efficiency with lower dG-value (5). Transmembrane domains were categorized as marginally hydrophobic if they had a dG-value higher than 0 ( $3 \rightarrow 0$ ), while transmembrane domains that had a score between 0 or lower ( $0 \rightarrow -\infty$ ) were categorized as hydrophobic.

### **Construct design, cloning, sequences**

Amino acid sequences of human ATP synthase subunit a (ATP6, Uniprot P00846), human cytochrome c oxidase subunit 1 (COX1, Uniprot P00395), human apocytochrome b (CYB, Uniprot P00156) and human Erlin-1 (ERLN1, Uniprot O75477) were downloaded from Uniprot (<http://www.uniprot.org/>). At the amino-terminus, a MDYKDDDDK- (initiator Met and FLAG tag) and AANDIL -sequence (linker) were added. The sequences were then flanked with 5'-EcoRI and 3'-NotI restriction sites. The synthetic genes were obtained from Life Technologies, and sub-cloned via the EcoRI and NotI sites to a CMV-promotor-containing pSNAPf vector (NEB; subcloning led to the removal of SNAPf). OMP25-GFP was a kind gift from Prof. Dr. James Rothman (New Haven, U.S.A.).

*Sequences* (red: initiator Met; green: FLAG tag; yellow: linker)

## COX1

>sp|P00395|COX1\_HUMAN Cytochrome c oxidase subunit 1 OS=Homo sapiens GN=MT-CO1 PE=1 SV=1

**MDYKDDDDKAANDIL**MFADRWLFSTNHKDIGTLYLLFGAWAGVLGTALSLLIRAE LGQPGNLLGNDHIYNVIVTA  
HAFVMIFFMVMPIMIGGFNWLVLPLMIGAPDMAFPRMNMSFWLLPSSL LLLASAMVEAGAGTGWTVYPPLAGN  
YSHPGASVDLTIFSLHLAGVSSILGAINFITTIINMKPPAMTQYQTPLFVWSVLITAVLLLLSLPVLAAAGITMLL  
TDRNLNTFFDFPAGGGDPILYQHLFWFFGHPEVYILILPGFGMISHIVTYYS GKKEPFGYMGMVWAMMSIGFLGF  
IVWAHMFVTVGMDVDTRAYFTSATMIIAIP TGVKVFSWLATLHGSNMKWSAAVLWALGFIFLFTVGGTGTIVLAN  
SSLDIVLHDTYYVVAHFHYVLSMGAVFAIMGGFIHWFP LFSGYTLDQTYAKIHFTIMFIGVNLTFPPQHFLGLSG  
MPRRYSYDPDAYTTWNILSSVGSFISLTAVMLMIFMIWEAFASKRKRKVLVVEEPSMNLEWLYGCPPPYHTFEEPVY  
MKS

### Reverse translated:

gaattcatggactacaaggacgacgacgacaagggccgccaacgacatcctgatgttcgccgacagatggctgttc  
agcaccacaccacaaggacatcggcaccctgtacctgctgttcggcgccctgggcccggcgtgctgggcaccgcctg  
agcctgctgactcagagccgagctgggccagcccggcaacctgctgggcaacgaccacatctacaacgtgatcgtg  
accgccacgccttcgctgatgatcttctcatggtgatgccatcatgatcggcggcttcggcaactggctggtg  
cccctgatgatcggcgccccgacatggccttccccagaatgaacaacatgagcttctggtgctgccccccagc  
ctgctgctgctgctggccagcgccatggtggaggccggcgccggcaccggctggaccgtgtacccccctggcc  
ggcaactacagccacccccggcgccagcgtggacctgaccatcttcagcctgcacctggccggcgtgagcagcctc  
ctgggcgccatcaacttcatcaccaccatcatcaacatgaagcccccgccatgaccagtagaccagccccctg  
ttcgtgtggagcgtgctgatcaccgccgtgctgctgctgctgagcctgcccgtgctggccgccggcatcaccatg  
ctgctgaccgacagaaacctgaacaccaccttcttcgacccccgcccggcggcgacccatcctgtaccagcac  
ctgttctggttcttcggccacccccgaggtgtacatcctgatcctgcccggcttcggcatgatcagccacatcgtg  
acctactacagcggcaagaaggagcccttcggctacatgggcatggtgtgggcatgatgagcatcggcttctctg  
ggcttcatcgtgtgggcccaccacatgttcaccgtgggcatggacgtggacaccagagcctacttcaccagcgcc  
accatgatcatcgccatccccaccggcgtgaaggtgttcagctggctggccaccctgcacggcagcaacatgaag  
tggagcgcgcgctgctgtgggcccctgggcttcatcttctgttcaccgtgggcccactgaccggcagcctgctg  
gccaacagcagcctggacatcgtgctgcacgacacctactacgtggtggcccacttccactacgtgctgagcatg  
ggcgccgtgttcgcccacatggggcggttccatccactggttccccctgttcagcggctacaccctggaccagacc  
tacgccaagatccacttcaccatcatgttcatcggc  
gtgaacctgaccttcttccccagcacttctgggctgagcggcatgcccagaagatacagcgactacccccgac  
gcctacaccacctggaacatcctgagcagcgtgggcagcttcatcagcctgaccgccgtgatgctgatgatcttc  
atgatctgggagccttcgccagcaagagaaaggtgctgatggtggaggagcccagcatgaacctggagtggtg  
tacggctgccccccccctaccacaccttcgaggagcccgtgtacatgaagagcTAGTAGgcccggcgc

## CYB

>sp|P00156|CYB\_HUMAN Cytochrome b OS=Homo sapiens GN=MT-CYB PE=1 SV=2

**MDYKDDDDKAANDIL**MTPMRKTNPLMKLINHSFIDLPTPSNISAWWNFGSLLGACLILQITITGLFLAMHYS  
PDASTAFSSIAHITRDVNYGWIIRYLHANGASMFFICLFLHIGRGLYYGSFLYSETWNIIGIILLLATMATAFMGYVLPW  
GQMSFWGATVITNLLSAIPYIGTDLVQWIWGGYSVDSPTLTRFFTFHFILPFI IAALATLHLLFLHETGSNNPLG  
ITSHSDKITFHPYYTIKDALGLLLFLLSLMTLTLFSPDLLGDPDNYTLANPLNTPPHIKPEWYFLFAYTILRSVP  
NKLGGV LALLSILILAMIPILHMSKQSQSMFRPLSQSLYWLLAADLLILTWIGGQPVSYPTIIGQVASVLYFT  
TILILMPTISLIENKMLKWA

### Reverse translated:

gaattcatggactacaaggacgacgacgacaagggccgccaacgacatcctgatgacccccatgagaaagaccaac  
cccctgatgaagctgatcaaccacagcttcatcgacctgccacccccagcaacatcagcgccctggtggaacttc  
ggcagcctgctgggcgcctgctgatcctgcagatcaccaccggcctgttcttcggccatgactacagccccgac  
gccagcaccgccttcagcagcctcggccacatcaccagagcgtgaactacggcgtggtgactacagatcactgcac  
gccaacggcgccagcagcttcttcatctgcctgttcttcgacatcggcagaggcctgtactacggcagcttctg  
tacagcgagacctggaacatcggcatcatcctgctgctggccaccatggccaccgccttcatgggctacgtgctg  
ccctggggccagatgagcttctggggcgccaccgtgatcaccacacctgctgagcggccatccccacatcggcacc  
gacctggtgcagtgatctggggcggttacagcgtggacagccccaccctgaccagattcttcaccttccacttc  
atcctgcccttcatcctgcggccctggccaccctgcacctgctgttcttcgacgagaccggcagcaacaacccc  
ctgggcatcaccagccacagcgacaagatcaccttccaccctactacaccatcaaggacgcccctgggctgctg  
ctgttctgctgagcctgatgacctgacctgttcagccccgacctgctgggcgacccccgacaactacacctg  
gccaacccccctgaacacccccccccacatcaagcccagtggtacttctgttcgctacaccatcctgagaagc  
gtgcccacaagctggggcgctgctggccctgctgctgagcatcctgatcctggccatgatccccatcctgcac  
atgagcaagcagcagagcatgatgttcagaccctgagccagagcctgactggctgctggccgccgacctgctg  
atcctgacctggatcggcgccagcccgtgagctacccttaccatcatcggccagtgccagcgtgctgctgac

ttcaccaccatcctgatcctgatgccaccatcagcctgatcgagaacaagatgctgaagtgggccTAGTAGgcg  
gcccgc

### ATP6

>sp|P00846|ATP6\_HUMAN ATP synthase subunit a OS=Homo sapiens GN=MT-ATP6  
PE=1 SV=1

MDYKDDDDKAANDILMNENLFASFIAPTILGLPAAVLIILFPPLLIPTSKYLINNRLITTTQQWLIKLTSKQMMTM  
HNTKGRTWSLMLVSLIIFIATTNLLGLLPHSFTPTTQLSMNLAMAIPLWAGTVIMGFRSKIKNALAHFLPQGTPPT  
PLIPMLVIIETISLLIQPMALAVRLTANITAGHLLMHLIGSATLAMSTINLPSTLIIFTILILLTILEIAVALIQ  
AYVFTLLVSLYLHDNT

### Reverse translated:

gaattcatggactacaaggacgacgacgacaagggccgccaacgacatcctgatgaacgagaacctgttcgccagc  
ttcatcgccccaccatcctgggcctgcccgcgcctgctgatcatcctgttccccccctgctgatccccacc  
agcaagtacctgatcaacaacagactgatcaccaccagcagtgctgatcaagctgaccagcaagcagatgatg  
accatgcacaacaccaaggcagaacctggagcctgatgctggtgagcctgatcatcttcacgccaccaccaac  
ctgctgggcctgctgccccacagcttcacccccaccaccagctgagcatgaacctggccatggccatccccctg  
tggcgccgacccgtgatcatgggcttcagaagcaagatcaagaacgccctggcccactcctgccccagggcacc  
ccccccccctgatccccatgctggtgatcatcgagaccatcagcctgctgatccagccatggccctggccgtg  
agactgaccgccaacatcaccgcccgcacctgctgatgcacctgatcggcagcggccacctggccatgagcacc  
atcaacctgcccagcaccctgatcatcttcaccatcctgatcctgctgaccatcctggagatcgccctggccctg  
atccaggcctacgtgttcaccctgctggtgagcctgtacctgcacgacaacaccTAGTAGgcgggcccgc

### ERLN1

>sp|O75477|ERLN1\_HUMAN Erlin-1 OS=Homo sapiens GN=ERLIN1 PE=1 SV=1

MDYKDDDDKAANDILMTQARVLVAAVVGLVAVLLYASIHKIEEGHLAVYYRGGALLTSPSGPGYHIMLPFITTFR  
SVQTTLOTDEKVNPCGTSGGVMIYIDRIEVDNMLAPYAVFDIVRNYTADYDKTLIFNKIHHELNQFCSAHTLQE  
VYIELFDQIDENLQALQKDLNLMAPGLTIQAVRVTKPKIPEAIRNFELMEAEKTKLLIAAQKQKVVEKEAETE  
RKKAVIEAEKIAQVAKIRFQQKVMKEKETEKRISIEIDAAFLAREKAKADAEEYAAHKYATSNKHKLTPPEYLELKK  
YQAIASNSKIYFGSNIPNMFVDSSCALKYSDIRTGRESSLPSKEALEPSGENVIQNKESTG

### Reverse translated:

gaattcatggactacaaggacgacgacgacaagggccgccaacgacatcctgatgaccaggccagagtgctggtg  
gcccgcctggtgggctggtggccctgctgctgtacgccagcatccacaagatcgaggaggccacctggccctg  
tactacagaggcggcgccctgctgaccagccccagcggccccggctaccacatcatgctgccccttcaccacc  
ttcagaagcgtgcagaccacctgcagaccgacgaggtgaagaacctgcccctgcggcaccagcggcgccgtgatg  
atctacatcgacagaatcgaggtggtgaacatgctggccccctacgccctgttcgacatcgtgagaaactacacc  
gccgactacgacaagacctgatcttcaacaagatccaccacgagctgaaccagttctgcagcggccacacctg  
caggaggtgtacatcgagctgttcgaccagatcgacgagaacctgaagcaggccctgcagaaggacctgaacctg  
atggcccccgccctgaccatccaggccctgagagtgaccaagcccaagatccccgaggccatcagaagaaacttc  
gagctgatggaggccgagaagaccaagctgctgatcggcggccagaagcagaaggtggtggagaaggaggccgag  
accgagagaaagaaggccctgatcgaggccgagaagatcgcccaggtggccaagatcagattccagcagaaggtg  
atggagaaggagaccgagaagagaatcagcgagatcgaggacggcccttcctggccagagagaaggccaaggcc  
gacggcggagtactacggcggccacaagtagccaccagcaacaagcacaagctgacccccgagtacctggagctg  
aagaagtaccaggccatcgccagcaacagcaagatctacttcggcagcaacatcccccaacatgttcgtggacagc  
agctgcccctgaagtacagcgacatcagaaccggcagagagagcagcctgcccagcaaggaggccctggagccc  
agcggcgagaacctgatccagaacaaggagagcaccggcTAGTAGgcgggcccgc

### Cell culture and transfection

HeLa cells were cultured in DMEM (Gibco) with 10% FCS at 5% CO<sub>2</sub> and 37°C.

Transfection was performed using FuGENE HD transfection reagent (Promega) following the instructions of the manufacturer (300 ng plasmid/1 µl Fugene HD / 35 mm glass bottom dish).

## **Confocal microscopy**

Cells were plated on 35mm glass bottom dishes (MatTek Corp.) and transfected using FuGENE HD. After 24 h, the cells were washed three times with PBS (pH 7.4) and fixed with 3.6% PFA (Sigma-Aldrich) and 0.1% glutaraldehyde for 20 min on ice. For endomembrane staining, the cells were permeabilized with 0.01% saponin in block buffer (PBS containing 5% goat serum) for 45 min at RT. Immunofluorescence staining was performed by dilution of primary antibodies in block buffer as follows: rabbit anti-FLAG antibody 1:250 (Sigma-Aldrich, F7425), mouse anti-FLAG antibody 1:250 (Sigma-Aldrich, F3040), mouse anti-calnexin 1:500 (Abcam, AF18), rabbit anti-TOM20 1:500 (Santa Cruz, FL-145), and incubated for 1h at RT. After 3 washes for 5 min in PBS, the cells were incubated with secondary antibodies as follows: goat anti-mouse Alexa488 1:1000 (Life Technologies, A11029), goat anti-mouse Alexa647 1:1000 (Life Technologies, A21236), goat anti-rabbit Alexa488 1:1000 (Life Technologies, A11034), goat anti-rabbit Alexa647 1:1000 (Life Technologies, A21245), and incubated for 1h at RT, and subsequently washed 3 times for 5 min in PBS at RT. The samples were then subjected to confocal microscopy using a Zeiss LSM 510 Meta and a 63x, 1.3 NA Plan-NEOFLUAR oil objective. Image processing was performed using Zen 2011 and ImageJ software (<http://fiji.sc/Fiji>).

## **Selection of taxa/proteomes for SF-domain analyses**

To study phyletic distribution of protein domains and to reconstruct ancestral domain content a reliable phylogeny is essential. We used a published multi-gene phylogeny inferred to propose the root of the eukaryote tree of life (7), which includes major eukaryotic and bacterial taxa. Among the taxa included in the phylogeny we limited our analyses to 43 eukaryotes and 13 bacteria (Table-S6) for which complete genome sequences were available at the time of this study.

Mitochondrial protein sequences were obtained from the MitoCOG collection (8), (<ftp://ftp.ncbi.nih.gov/pub/koonin/MitoCOGs/>) and specific protein collections for the human mitochondrial ribosome and OXPHOS proteins were obtained from the HUGO Gene Nomenclature Committee at <http://www.genenames.org/genefamilies/MRP> and <http://www.genenames.org/genefamilies/mitocomplex> respectively.

Finally biochemically verified mitochondrial proteins downloaded from the MitoMiner database (9). Experimental evidence for mitochondrial localization is obtained from 58 large-scale proteomic analyses and/or from GFP tagged localization. The MitoMiner ‘reference set’ is a compilation of about 13,000 proteins from 12 model organisms (Table-SX). To be reliably identified as a protein localized to mitochondria, the criteria for a protein to be in the reference set is that mitochondrial localization is required to be supported by at least three independent mass spectrometry experiments or one GFP tagged localization. Although a larger set of proteins (26,000) is available from MitoMiner, we used the reference set to exclude false positives, which is common in proteomic analyses. However, using stringent filters is prone to false negatives. For example, known mitochondrial proteins such as the F1F0 ATP synthase complex subunits were excluded when we applied stringent filters. It is also common with proteomics studies that membrane associated proteins are missed due to difficulties in extracting membrane proteins.

Therefore, the most satisfactory option to compile a nominal ‘mitochondrial proteome’ was to use a combination of stringently filtered MitoMiner reference set and a collection of mitochondrial genome encoded proteins from the MitoCOG database.

### **SCOP superfamily annotations**

Structural Classification of Proteins Superfamilies (SCOP-SF): Proteins domain annotations at the level of SCOP superfamily for sequenced genomes were either

downloaded from a local installation of SUPERFAMILY (ver 1.75) database. For genomes for which SUPERFAMILY annotations were unavailable, proteins sequences were downloaded from corresponding genome project repositories and SF-domain assignments were carried out as described in (10). A library of hidden Markov models (HMM) representing SCOP Superfamilies and PERL scripts required for SF domain assignments of genome sequences were obtained from the SUPERFAMILY database (<ftp.supfam.org>). Protein sequences were scored against HMM profiles using the hmmscan program from the HMMER 3.0 software package (11). An *E*-value threshold of  $10^{-4}$  was used to select assignments. Function annotation of SF domains (12) was also obtained from the SUPERFAMILY database.

### **Ancestral domain content and domain flux analyses**

SF-domains corresponding to the mitochondrial proteome were extracted from each genome and saved as a matrix of characters representing SF-domain occurrence (presence/absence). The most parsimonious scenarios of mitochondrial proteome evolution and the domain content of the mitochondrial ancestor were reconstructed by using generalized parsimony based ancestral-state reconstruction as implemented in PAUP\* (13). SF-domain presence/absence was coded as binary character-states and a rooted eukaryotic and bacterial phylogeny (7) was used for character mapping. Based on the understanding that genesis of a structural-domain is very difficult and rare during evolution (14), a gain penalty of 2 and a loss penalty of 1 was applied to the occurrence matrix.



**Fig S1**

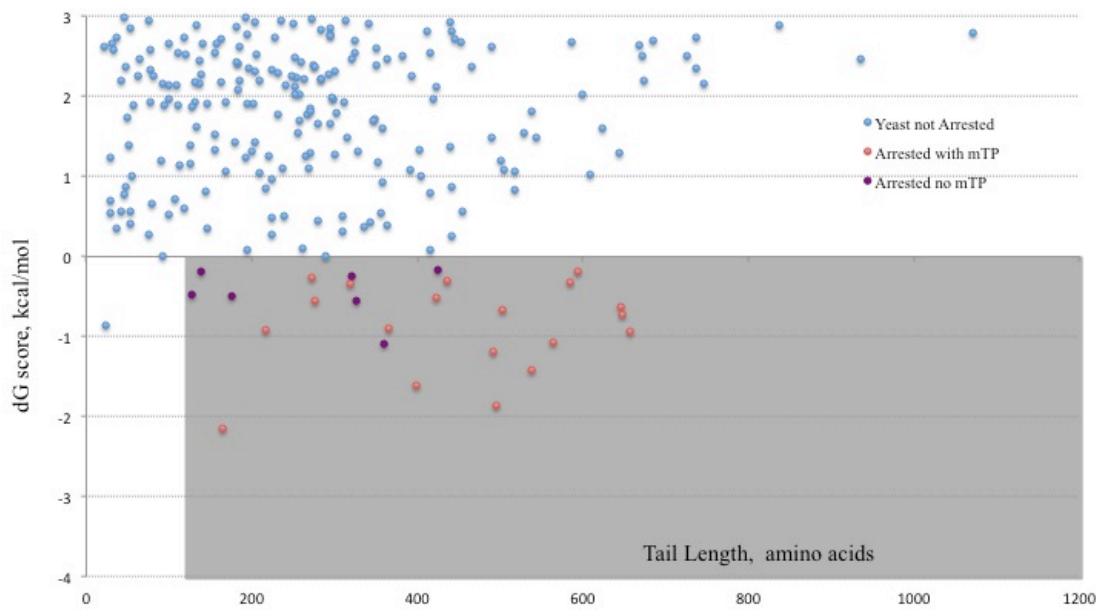

**Figure S1. Biophysical characteristics of mitochondrial membrane proteins encoded by the nuclear genome.** The figure shows the insertion free energy ( $\Delta G$ ) and the length of the TMD and the following C-terminal tail for human and yeast proteins localized to mitochondria with the aid of green fluorescent tags. The insertion free energy (kcal/mol) has been estimated for either the first TMD with a calculated  $\Delta G$  value below zero or if no such segment was found, the most hydrophobic segment in the protein. Blue dots represent proteins that are not targeted by SRP. Red dots correspond to proteins that are putative targets for SRP with a mitochondrial target peptide (mTP) and the purple are proteins without an mTP. Characteristics of proteins that are putative targets for recognition by SRP are indicated with the green area.

**Figure S2**

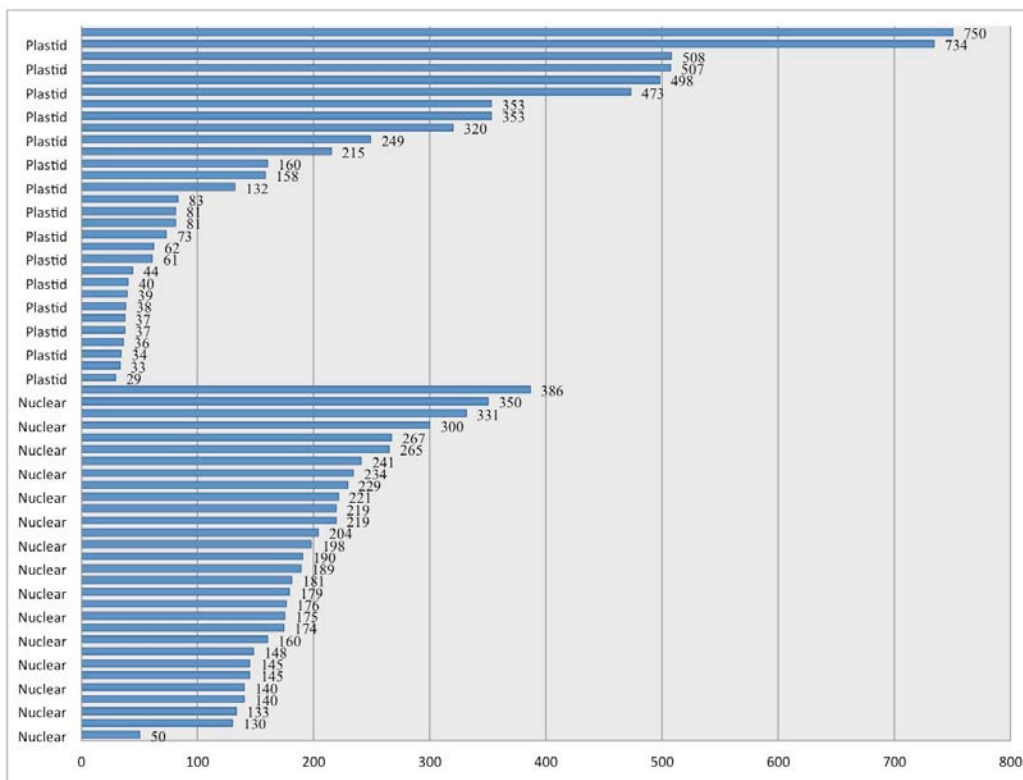

**Figure S2. Length of chloroplast proteins.** Proteins involved in the photosynthetic apparatus of *Arabidopsis thaliana* are sorted according to their amino acid length for both plastid and nuclear encoded proteins.

**Figure S3**

**Phyletic distribution of mito-Ribosomal SF-domains**

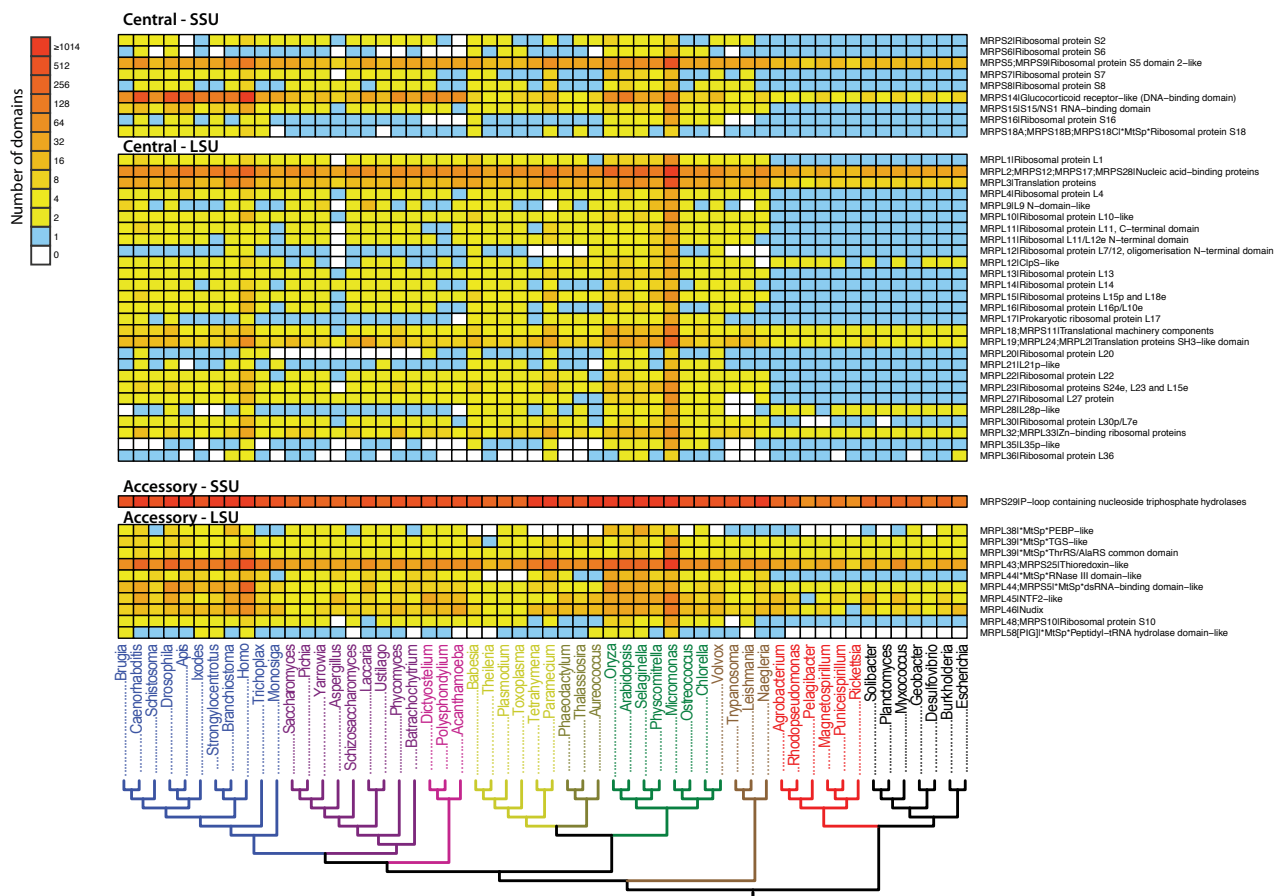

**Figure S3.** Phyletic distribution of SF-domains of mitochondrial ribosomal proteins in eukaryotes and bacteria. The number of central and accessory SF-domains identified in each species of eukaryotes and bacteria are compared along the phylogeny. Columns correspond to the species in the phylogenetic tree and rows are individual mito-ribosomal SF-domains. The colors indicate the number of domains in each species if present and boxes are white if a SF-domain is absent.

**Figure S4**

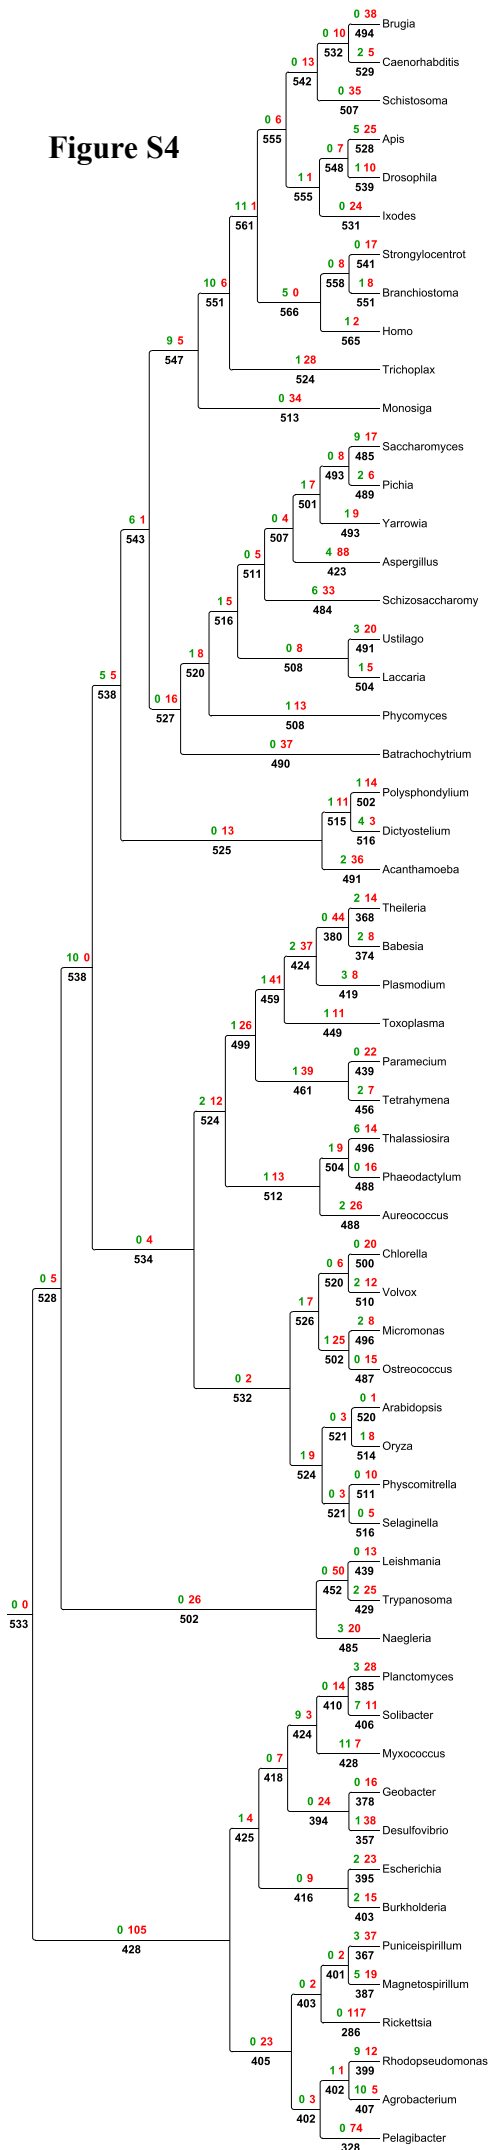

**Figure S4.** Flux of SF-domains during evolution in the “mitochondrial proteome”. Parsimonious reconstruction of flux SF-domains that are associated with mitochondria were mapped onto the eukaryote phylogeny. The number of superfamilies inferred to have been gained (green), lost (red) and the total number present at each node or branch (black) are indicated.

**Table S1. Mitochondrial proteins involved in the respiratory chain complex in humans.**

The proteins are listed according to the complexes in which they occur. Encoded = the genome in which the gene is located (mitochondrial or nuclear); Uniprot ID = the Uniprot identifier of the protein; TMD start = the location of the first hydrophobic segment or the location of the most hydrophobic marginally hydrophobic segment if no hydrophobic segment is present; TMD = length of the transmembrane domain; Hydro = hydrophobicity (free insertion energy (dG, kcal/mol)) of the selected transmembrane domain; Tail = length of the selected transmembrane domain and the C-terminal tail; SRP Target = the prediction of whether the protein would be a target by SRP.

| Complex   | Encoded | Uniprot ID | TMD start | TMD | Hydro  | Tail | SRP Target |
|-----------|---------|------------|-----------|-----|--------|------|------------|
| Complex I | Mito    | P03886     | 3         | 21  | -2,422 | 295  | Yes        |
| Complex I | Mito    | P03891     | 200       | 22  | -0,887 | 126  | Yes        |
| Complex I | Mito    | P03897     | 3         | 22  | -3,46  | 91   | No         |
| Complex I | Mito    | P03905     | 94        | 23  | -0,372 | 343  | Yes        |
| Complex I | Mito    | P03901     | 1         | 23  | -1,045 | 75   | No         |
| Complex I | Mito    | P03915     | 80        | 22  | -0,156 | 502  | Yes        |
| Complex I | Mito    | P03923     | 1         | 20  | -0,846 | 154  | Yes        |
| Complex I | Nuclear | O15239     | 5         | 22  | -0,056 | 44   | No         |
| Complex I | Nuclear | O43678     | n/a       | n/a | n/a    | n/a  | No         |
| Complex I | Nuclear | O95167     | 17        | 19  | 1,374  | 49   | No         |
| Complex I | Nuclear | Q16718     | n/a       | n/a | n/a    | n/a  | No         |
| Complex I | Nuclear | P56556     | n/a       | n/a | n/a    | n/a  | No         |
| Complex I | Nuclear | O95182     | n/a       | n/a | n/a    | n/a  | No         |
| Complex I | Nuclear | P51970     | n/a       | n/a | n/a    | n/a  | No         |
| Complex I | Nuclear | Q16795     | 280       | 23  | 1,035  | 75   | No         |
| Complex I | Nuclear | O95299     | n/a       | n/a | n/a    | n/a  | No         |
| Complex I | Nuclear | Q86Y39     | 59        | 20  | 1,027  | 63   | No         |
| Complex I | Nuclear | Q9UI09     | n/a       | n/a | n/a    | n/a  | No         |
| Complex I | Nuclear | Q9P0J0     | 27        | 22  | 1,475  | 96   | No         |
| Complex I | Nuclear | O14561     | n/a       | n/a | n/a    | n/a  | No         |
| Complex I | Nuclear | O75438     | 12        | 19  | 2,626  | 28   | No         |
| Complex I | Nuclear | O95178     | 55        | 20  | 0,936  | 31   | No         |
| Complex I | Nuclear | O43676     | 70        | 19  | 0,967  | 10   | No         |
| Complex I | Nuclear | O95168     | 88        | 20  | 0,351  | 22   | No         |
| Complex I | Nuclear | O43674     | 70        | 23  | -1,483 | 97   | No         |
| Complex I | Nuclear | O95139     | 69        | 20  | 1,259  | 40   | No         |
| Complex I | Nuclear | P17568     | n/a       | n/a | n/a    | n/a  | No         |
| Complex I | Nuclear | O95169     | 128       | 23  | -1,106 | 36   | No         |
| Complex I | Nuclear | Q9Y6M9     | n/a       | n/a | n/a    | n/a  | No         |
| Complex I | Nuclear | O96000     | n/a       | n/a | n/a    | n/a  | No         |
| Complex I | Nuclear | Q9NX14     | 87        | 23  | -2,342 | 44   | No         |
| Complex I | Nuclear | O43677     | 41        | 19  | -0,043 | 17   | No         |
| Complex I | Nuclear | O95298     | 59        | 19  | 0,354  | 42   | No         |
| Complex I | Nuclear | P28331     | n/a       | n/a | n/a    | n/a  | No         |
| Complex I | Nuclear | O75306     | 184       | 21  | 2,463  | 259  | No         |

|             |         |            |     |     |        |     |     |
|-------------|---------|------------|-----|-----|--------|-----|-----|
| Complex I   | Nuclear | O75489     | 7   | 20  | 1,782  | 238 | No  |
| Complex I   | Nuclear | O43181     | 13  | 23  | 1,92   | 140 | No  |
| Complex I   | Nuclear | O43920     | n/a | n/a | n/a    | n/a | No  |
| Complex I   | Nuclear | O75380     | n/a | n/a | n/a    | n/a | No  |
| Complex I   | Nuclear | O75251     | 79  | 20  | 2,575  | 115 | No  |
| Complex I   | Nuclear | O00217     | 55  | 23  | 2,223  | 133 | No  |
| Complex I   | Nuclear | P49821     | n/a | n/a | n/a    | n/a | No  |
| Complex I   | Nuclear | P19404     | n/a | n/a | n/a    | n/a | No  |
| Complex I   | Nuclear | P56181     | n/a | n/a | n/a    | n/a | No  |
| Complex II  | Nuclear | P31040     | 451 | 21  | 2,76   | 193 | No  |
| Complex II  | Nuclear | P21912     | 180 | 22  | 2,152  | 79  | No  |
| Complex II  | Nuclear | Q99643     | 148 | 22  | 0,485  | 0   | No  |
| Complex II  | Nuclear | O14521     | 1   | 23  | -0,111 | 136 | Yes |
| Complex III | Mito    | P00156     | 29  | 23  | -1,019 | 329 | Yes |
| Complex III | Nuclear | P08574     | 287 | 22  | -0,187 | 17  | No  |
| Complex III | Nuclear | Q9UDW<br>1 | 14  | 23  | -0,677 | 27  | No  |
| Complex III | Nuclear | O14957     | 20  | 23  | -0,074 | 14  | No  |
| Complex III | Nuclear | P14927     | n/a | n/a | n/a    | n/a | No  |
| Complex III | Nuclear | P31930     | n/a | n/a | n/a    | n/a | No  |
| Complex III | Nuclear | P22695     | 213 | 19  | 2,829  | 222 | No  |
| Complex III | Nuclear | P47985     | 210 | 19  | 2,574  | 46  | No  |
| Complex III | Nuclear | P07919     | n/a | n/a | n/a    | v   | No  |
| Complex III | Nuclear | O14949     | 46  | 19  | 0,986  | 18  | No  |
| Complex IV  | Nuclear | P13073     | 100 | 22  | -0,394 | 48  | No  |
| Complex IV  | Nuclear | Q96KJ9     | 102 | 23  | -2,249 | 47  | No  |
| Complex IV  | Nuclear | P20674     | n/a | n/a | n/a    | n/a | No  |
| Complex IV  | Nuclear | P10606     | n/a | n/a | n/a    | n/a | No  |
| Complex IV  | Nuclear | P12074     | 37  | 23  | 0,665  | 50  | No  |
| Complex IV  | Nuclear | Q02221     | 25  | 21  | -0,671 | 52  | No  |
| Complex IV  | Nuclear | P14854     | n/a | n/a | n/a    | n/a | No  |
| Complex IV  | Nuclear | Q6YFQ2     | n/a | n/a | n/a    | n/a | No  |
| Complex IV  | Nuclear | P09669     | 18  | 23  | 0,179  | 35  | No  |
| Complex IV  | Nuclear | P24310     | 51  | 23  | 0,396  | 6   | No  |
| Complex IV  | Nuclear | P14406     | 52  | 23  | 0,424  | 9   | No  |
| Complex IV  | Nuclear | P24311     | 40  | 19  | 1,126  | 22  | No  |
| Complex IV  | Nuclear | Q8TF08     | 41  | 19  | 1,138  | 22  | No  |
| Complex IV  | Nuclear | P15954     | 37  | 21  | 1,51   | 6   | No  |
| Complex IV  | Nuclear | P10176     | 40  | 20  | 0,218  | 10  | No  |
| Complex IV  | Nuclear | Q7Z4L0     | 39  | 23  | 0,821  | 11  | No  |
| Complex IV  | Mito    | P00395     | 17  | 23  | -1,009 | 474 | Yes |
| Complex IV  | Mito    | P00403     | 27  | 22  | -4,536 | 179 | Yes |
| Complex IV  | Mito    | P00414     | 79  | 23  | -1,361 | 160 | Yes |
| Complex V   | Nuclear | P25705     | n/a | n/a | n/a    | n/a | No  |
| Complex V   | Nuclear | P06576     | n/a | n/a | n/a    | n/a | No  |
| Complex V   | Nuclear | P36542     | n/a | n/a | n/a    | n/a | No  |

|           |         |        |     |     |        |     |     |
|-----------|---------|--------|-----|-----|--------|-----|-----|
| Complex V | Nuclear | P30049 | 62  | 20  | 2,639  | 87  | No  |
| Complex V | Nuclear | P56381 | n/a | n/a | n/a    | n/a | No  |
| Complex V | Nuclear | P24539 | 92  | 23  | 1,678  | 142 | No  |
| Complex V | Nuclear | P05496 | 115 | 22  | -1,862 | 0   | No  |
| Complex V | Nuclear | Q06055 | 120 | 22  | -1,862 | 0   | No  |
| Complex V | Nuclear | P48201 | 121 | 22  | -1,862 | 0   | No  |
| Complex V | Nuclear | O75947 | n/a | n/a | n/a    | n/a | No  |
| Complex V | Nuclear | P56385 | 11  | 23  | 1,507  | 36  | No  |
| Complex V | Nuclear | P18859 | n/a | n/a | n/a    | n/a | No  |
| Complex V | Nuclear | P56134 | 63  | 20  | 0,868  | 12  | No  |
| Complex V | Nuclear | O75964 | 68  | 22  | 2,079  | 14  | No  |
| Complex V | Nuclear | Q7Z4Y8 | 68  | 23  | 2,772  | 10  | No  |
| Complex V | Nuclear | P48047 | n/a | n/a | n/a    | n/a | No  |
| Complex V | Nuclear | Q9UII2 | 1   | 23  | 2,802  | 83  | No  |
| Complex V | Mito    | P00846 | 9   | 23  | -1,173 | 217 | Yes |
| Complex V | Mito    | P03928 | 7   | 23  | -0,091 | 61  | No  |

**Table S2. Mitochondrial membrane proteins with determined structures.** PDB+Chain = the PDB structure identifier and the specific chain of the protein; Encoded = the genome in which the gene is located (mitochondrial or nuclear); Hydro = hydrophobicity (free insertion energy (dG, kcal/mol)) of the selected transmembrane domain; Uniprot ID = the Uniprot identifier of the protein; TMD = length of the transmembrane domain; Tail = length of the selected transmembrane domain and the C-terminal tail; SRP Target = the prediction of whether the protein would be a target by SRP.

| <b>PDB+chain</b> | <b>Encoded</b> | <b>Hydro</b> | <b>Uniprot ID</b> | <b>TMD</b> | <b>Tail</b> | <b>SRP Target</b> |
|------------------|----------------|--------------|-------------------|------------|-------------|-------------------|
| 1PP9:C           | Mito           | -2,009       | P00157            | 23         | 349         | Yes               |
| 1V55:A           | Mito           | -0,705       | P00396            | 23         | 497         | Yes               |
| 1V55:B           | Mito           | -2,178       | P68530            | 23         | 199         | Yes               |
| 1V55:C           | Mito           | -2,083       | P00415            | 23         | 182         | Yes               |
| 2XOK:K           | Mito           | -0,927       | P61830            | 23         | 64          | No                |
| 3CX5:C           | Mito           | -0,889       | P00163            | 23         | 357         | Yes               |
| 3H1J:C           | Mito           | -1,127       | P18946            | 23         | 350         | Yes               |
| 1V55:L           | Nuclear        | -0,901       | P00430            | 23         | 28          | No                |
| 1V55:J           | Nuclear        | -0,475       | P07470            | 23         | 29          | No                |
| 1V55:M           | Nuclear        | 0,518        | P10175            | 20         | 30          | No                |
| 1YQ3:D           | Nuclear        | 0,715        | Q5ZIS0            | 20         | 33          | No                |
| 3VR8:C           | Nuclear        | -1,497       | P92506            | 22         | 36          | No                |
| 1ZOY:D           | Nuclear        | 0,109        | A5GZW8            | 20         | 36          | No                |
| 2FYU:K           | Nuclear        | 0,286        | P07552            | 23         | 36          | No                |
| 1L0L:K           | Nuclear        | 0,621        | P07552            | 23         | 36          | No                |
| 2YBB:k           | Nuclear        | 1,785        | P07552            | 23         | 36          | No                |
| 3H1J:G           | Nuclear        | 2,932        | D0VX32            | 19         | 36          | No                |
| 3H1J:D           | Nuclear        | -0,554       | D0VX26            | 20         | 38          | No                |
| 1L0L:D           | Nuclear        | -0,483       | P00125            | 20         | 38          | No                |
| 3VR8:D           | Nuclear        | -1,311       | P92507            | 23         | 39          | No                |
| 1V55:K           | Nuclear        | 0,904        | P13183            | 19         | 40          | No                |
| 1L0L:G           | Nuclear        | 1,043        | P13271            | 23         | 40          | No                |
| 3CX5:D           | Nuclear        | -0,012       | P07143            | 20         | 41          | No                |
| 3CX5:H           | Nuclear        | 0,777        | P08525            | 23         | 45          | No                |
| 2LOS:A           | Nuclear        | 0,997        | Q9P0S9            | 20         | 50          | No                |
| 3H1J:J           | Nuclear        | -0,553       | N/A               | 23         | 51          | No                |
| 3CX5:I           | Nuclear        | 1,002        | P22289            | 23         | 56          | No                |
| 1V55:I           | Nuclear        | -0,384       | P04038            | 23         | 58          | No                |
| 1L0L:E           | Nuclear        | 2,574        | P13272            | 19         | 64          | No                |
| 1V55:D           | Nuclear        | -1,332       | P00423            | 21         | 69          | No                |
| 2YBB:R           | Nuclear        | -0,142       | P07471            | 23         | 69          | No                |
| 1OKC:A           | Nuclear        | 1,956        | P02722            | 22         | 88          | No                |
| 1ZOY:C           | Nuclear        | 0,47         | D0VWV4            | 21         | 97          | No                |
| 1YQ3:C           | Nuclear        | 0,127        | D0VWW<br>3        | 21         | 98          | No                |
| 1YQ3:B           | Nuclear        | 2,152        | Q9YHT2            | 22         | 100         | No                |
| 4C9G:A           | Nuclear        | 0,249        | P18239            | 23         | 101         | No                |
| 3VR8:B           | Nuclear        | 1,89         | O44074            | 19         | 103         | No                |
| 2YBB:8           | Nuclear        | 1,968        | Q56224            | 21         | 132         | No                |



|        |         |        |        |    |     |     |
|--------|---------|--------|--------|----|-----|-----|
| 2YBB:6 | Nuclear | 2,225  | Q56218 | 19 | 145 | No  |
| 2YBB:3 | Nuclear | 2,971  | Q56223 | 20 | 146 | No  |
| 3H1J:E | Nuclear | 1,989  | Q5ZLR5 | 19 | 162 | No  |
| 3CX5:E | Nuclear | 2,172  | P08067 | 19 | 162 | No  |
| 1YQ3:A | Nuclear | 2,147  | Q9YHT1 | 22 | 213 | No  |
| 1ZOY:A | Nuclear | 2,598  | Q0QF01 | 22 | 213 | No  |
| 1L0L:B | Nuclear | 2,829  | P23004 | 19 | 240 | No  |
| 2YBB:4 | Nuclear | 0,887  | Q56220 | 22 | 279 | No  |
| 2LCK:A | Nuclear | 1,73   | P70406 | 22 | 302 | No  |
| 2YBB:1 | Nuclear | 1,934  | Q56222 | 23 | 325 | No  |
| 4AYX:A | Nuclear | -0,576 | Q9NRK6 | 23 | 534 | Yes |
| 4MYC:A | Nuclear | -0,32  | P40416 | 19 | 589 | Yes |
| 3VR8:A | Nuclear | 2,371  | Q33862 | 20 | 604 | No  |

**Table S3. Proteins localized to the mitochondrion with the aid of green fluorescent protein tags.** Uniprot ID = the Uniprot identifier of the protein; Species = the species in which the protein was identified; Hydro = hydrophobicity (free insertion energy (dG, kcal/mol)) of the selected transmembrane domain; Tail = length of the selected transmembrane domain and the C-terminal tail; SRP Target = the prediction if the protein would be a targeted by SRP.

| <b>Uniprot ID</b> | <b>Species</b> | <b>Hydro</b> | <b>Tail</b> | <b>SRP Target</b> |
|-------------------|----------------|--------------|-------------|-------------------|
| Q8WVC6            | Human          | -1,309       | 29          | No                |
| Q9Y5T4            | Human          | -1,25        | 114         | No                |
| Q96LL9            | Human          | -2,214       | 20          | No                |
| Q9NNZ3            | Human          | -1,048       | 85          | No                |
| Q9H4I9            | Human          | -0,129       | 42          | No                |
| Q9HD23            | Human          | -2,135       | 71          | No                |
| Q9NWS8            | Human          | -0,258       | 23          | No                |
| Q9H1U9            | Human          | -0,19        | 86          | No                |
| Q96IX5            | Human          | -0,21        | 28          | No                |
| Q86XE5            | Human          | 0,989        | 101         | No                |
| Q9NVI7            | Human          | 1,362        | 541         | No                |
| Q5T9A4            | Human          | 1,414        | 401         | No                |
| Q8NE86            | Human          | 0,131        | 117         | No                |
| Q8IYU8            | Human          | 2,227        | 401         | No                |
| Q96EY8            | Human          | 2,546        | 238         | No                |
| Q9H8M1            | Human          | 2,797        | 206         | No                |
| Q96I36            | Human          | 1,879        | 43          | No                |
| Q9P0S2            | Human          | 0,789        | 91          | No                |
| Q5R115            | Human          | 2,552        | 84          | No                |
| Q86YH6            | Human          | 2,802        | 293         | No                |
| Q96CU9            | Human          | 1,287        | 421         | No                |
| Q14296            | Human          | 2,59         | 396         | No                |
| B2RBJ8            | Human          | 2,802        | 362         | No                |
| Q6P1Q0            | Human          | 2,664        | 279         | No                |
| Q8IV42            | Human          | 2,992        | 332         | No                |
| Q9H7H0            | Human          | 2,519        | 448         | No                |
| H7BXW7            | Human          | 0,562        | 59          | No                |
| Q96BW9            | Human          | 2,304        | 21          | No                |
| Q567V2            | Human          | 1,72         | 188         | No                |
| O75414            | Human          | 2,885        | 120         | No                |
| Q86X67            | Human          | 2,619        | 339         | No                |
| P49590            | Human          | 2,64         | 203         | No                |
| Q7L3T8            | Human          | 2,793        | 142         | No                |
| Q96ND0            | Human          | 1,089        | 137         | No                |
| Q3KR05            | Human          | 2,916        | 431         | No                |
| Q96CQ1            | Human          | 1,902        | 305         | No                |
| Q9NX18            | Human          | 2,48         | 154         | No                |
| P17152            | Human          | 1,652        | 109         | No                |
| Q9BUB7            | Human          | 2,109        | 259         | No                |

|        |       |        |     |     |
|--------|-------|--------|-----|-----|
| Q96GJ1 | Human | 2,154  | 491 | No  |
| Q8WWC4 | Human | 1,178  | 252 | No  |
| Q9BQ52 | Human | 2,988  | 718 | No  |
| Q96LL9 | Human | -2,214 | 20  | No  |
| A4D1T6 | Human | -1,23  | 529 | Yes |
| Q8IW45 | Human | -0,619 | 342 | Yes |
| Q96E52 | Human | -1,343 | 331 | Yes |
| Q9BVV7 | Human | -2,004 | 140 | Yes |
| P43617 | Yeast | 2,029  | 257 | No  |
| Q03829 | Yeast | 1,698  | 258 | No  |
| Q12251 | Yeast | 1,919  | 201 | No  |
| P40098 | Yeast | 0,856  | 217 | No  |
| Q06089 | Yeast | 1,529  | 155 | No  |
| P38172 | Yeast | 1,545  | 256 | No  |
| Q12082 | Yeast | 0,56   | 43  | No  |
| P36101 | Yeast | 0,252  | 441 | No  |
| Q3E7A6 | Yeast | 2,628  | 22  | No  |
| P40166 | Yeast | 2,67   | 99  | No  |
| Q12106 | Yeast | 2,913  | 250 | No  |
| P47131 | Yeast | 2,145  | 100 | No  |
| P32792 | Yeast | 0,312  | 309 | No  |
| P07806 | Yeast | 0,878  | 442 | No  |
| P10662 | Yeast | 2,404  | 184 | No  |
| P28817 | Yeast | 2,31   | 300 | No  |
| P39525 | Yeast | 2,806  | 441 | No  |
| P32378 | Yeast | 1,659  | 279 | No  |
| P36521 | Yeast | 2,853  | 54  | No  |
| P53163 | Yeast | 2,871  | 181 | No  |
| P36523 | Yeast | 2,472  | 64  | No  |
| Q12487 | Yeast | 2,152  | 137 | No  |
| P36516 | Yeast | 2,453  | 137 | No  |
| P09950 | Yeast | 2,631  | 185 | No  |
| Q06567 | Yeast | 1,823  | 538 | No  |
| P32874 | Yeast | 1,315  | 200 | No  |
| P04710 | Yeast | 1,236  | 192 | No  |
| P18238 | Yeast | 2,781  | 295 | No  |
| P07246 | Yeast | 2,933  | 204 | No  |
| P38884 | Yeast | 1,111  | 269 | No  |
| P40502 | Yeast | 2,249  | 81  | No  |
| Q03798 | Yeast | 0,074  | 194 | No  |
| P50945 | Yeast | 1,624  | 133 | No  |
| P38885 | Yeast | 1,783  | 266 | No  |
| P38341 | Yeast | 0,519  | 99  | No  |
| P25345 | Yeast | 2,604  | 350 | No  |
| Q01802 | Yeast | 1,322  | 328 | No  |
| P32580 | Yeast | 2,746  | 736 | No  |

|        |       |       |      |    |
|--------|-------|-------|------|----|
| P05626 | Yeast | 2,425 | 182  | No |
| P81449 | Yeast | 1,191 | 90   | No |
| Q06405 | Yeast | 1,244 | 29   | No |
| Q12233 | Yeast | 2,654 | 31   | No |
| Q12349 | Yeast | 2,533 | 120  | No |
| P81450 | Yeast | 1,745 | 50   | No |
| P81451 | Yeast | 1,384 | 51   | No |
| Q06485 | Yeast | 1,915 | 194  | No |
| P32451 | Yeast | 2,59  | 78   | No |
| P09440 | Yeast | 2,511 | 671  | No |
| Q07560 | Yeast | 1,046 | 210  | No |
| P43635 | Yeast | 2,934 | 439  | No |
| P00890 | Yeast | 1,893 | 57   | No |
| P07390 | Yeast | 0,796 | 415  | No |
| P37299 | Yeast | 0,874 | 47   | No |
| P08525 | Yeast | 0,777 | 45   | No |
| P22289 | Yeast | 1,002 | 56   | No |
| P08067 | Yeast | 2,172 | 162  | No |
| P07252 | Yeast | 1,19  | 501  | No |
| P14066 | Yeast | 2,997 | 45   | No |
| P14905 | Yeast | 2,5   | 382  | No |
| P38909 | Yeast | 0,369 | 336  | No |
| Q3E7B2 | Yeast | 0,403 | 53   | No |
| P39103 | Yeast | 0,573 | 54   | No |
| P04039 | Yeast | 0,691 | 29   | No |
| Q04935 | Yeast | 0,6   | 118  | No |
| P32799 | Yeast | 0,666 | 79   | No |
| P00431 | Yeast | 0,439 | 343  | No |
| P54783 | Yeast | 1,609 | 357  | No |
| P07275 | Yeast | 2,467 | 364  | No |
| P09624 | Yeast | 1,665 | 294  | No |
| P32891 | Yeast | 1,479 | 544  | No |
| P46681 | Yeast | 2,388 | 274  | No |
| P04819 | Yeast | 2,717 | 445  | No |
| P25846 | Yeast | 1,435 | 180  | No |
| P15801 | Yeast | 2,803 | 1071 | No |
| P25039 | Yeast | 2,02  | 600  | No |
| P39112 | Yeast | 1,779 | 231  | No |
| P40215 | Yeast | 1,494 | 490  | No |
| P36112 | Yeast | 1,089 | 505  | No |
| P33893 | Yeast | 2,379 | 465  | No |
| P32191 | Yeast | 1,286 | 644  | No |
| P26364 | Yeast | 1,917 | 146  | No |
| P0CS90 | Yeast | 2,15  | 241  | No |
| P49367 | Yeast | 2,118 | 252  | No |
| P28834 | Yeast | 2,55  | 111  | No |

|        |       |       |     |    |
|--------|-------|-------|-----|----|
| P48526 | Yeast | 2,348 | 736 | No |
| P38169 | Yeast | 0,571 | 455 | No |
| P11325 | Yeast | 2,916 | 341 | No |
| Q06510 | Yeast | 0,939 | 358 | No |
| Q01926 | Yeast | 1,334 | 155 | No |
| P53077 | Yeast | 0,351 | 36  | No |
| P22438 | Yeast | 2,221 | 264 | No |
| P32785 | Yeast | 2,376 | 47  | No |
| Q03028 | Yeast | 1,964 | 299 | No |
| Q99297 | Yeast | 2,753 | 295 | No |
| Q12289 | Yeast | 2,332 | 225 | No |
| P38702 | Yeast | 0,968 | 224 | No |
| P53320 | Yeast | 2,4   | 351 | No |
| P38127 | Yeast | 2,703 | 324 | No |
| P32839 | Yeast | 1,013 | 405 | No |
| P38323 | Yeast | 2,232 | 254 | No |
| Q06143 | Yeast | 2,212 | 283 | No |
| P18409 | Yeast | 2,436 | 260 | No |
| Q92328 | Yeast | 1,882 | 111 | No |
| P42834 | Yeast | 0,808 | 145 | No |
| Q04013 | Yeast | 2,74  | 37  | No |
| P40464 | Yeast | 1,108 | 238 | No |
| P48237 | Yeast | 2,123 | 423 | No |
| P38988 | Yeast | 2,951 | 236 | No |
| P39515 | Yeast | 2,663 | 141 | No |
| Q08749 | Yeast | 2,145 | 109 | No |
| P32897 | Yeast | 1,393 | 125 | No |
| Q01852 | Yeast | 2,809 | 411 | No |
| Q02776 | Yeast | 0,398 | 364 | No |
| P47045 | Yeast | 1,368 | 440 | No |
| P33448 | Yeast | 0,547 | 29  | No |
| P53507 | Yeast | 2,592 | 33  | No |
| P07213 | Yeast | 1,026 | 608 | No |
| P32795 | Yeast | 1,063 | 517 | No |
| P46972 | Yeast | 1,058 | 168 | No |
| P53239 | Yeast | 1,261 | 265 | No |
| P35999 | Yeast | 2,48  | 252 | No |
| P36046 | Yeast | 0,537 | 356 | No |
| P46998 | Yeast | 0,355 | 146 | No |
| P36163 | Yeast | 0,457 | 280 | No |
| Q03218 | Yeast | 1,71  | 349 | No |
| P53944 | Yeast | 2,358 | 196 | No |
| P39953 | Yeast | 1,981 | 296 | No |
| Q12375 | Yeast | 2,191 | 185 | No |
| P38325 | Yeast | 2,261 | 63  | No |
| P16547 | Yeast | 1,093 | 392 | No |

|        |       |       |     |    |
|--------|-------|-------|-----|----|
| P32332 | Yeast | 1,795 | 302 | No |
| P23641 | Yeast | 1,971 | 100 | No |
| P40035 | Yeast | 2,841 | 283 | No |
| P32898 | Yeast | 2,89  | 134 | No |
| P53157 | Yeast | 1,93  | 77  | No |
| P38857 | Yeast | 2,33  | 77  | No |
| P53311 | Yeast | 1,882 | 94  | No |
| P10566 | Yeast | 1,935 | 132 | No |
| P23500 | Yeast | 2,185 | 132 | No |
| P53257 | Yeast | 1,272 | 300 | No |
| P10849 | Yeast | 2,732 | 119 | No |
| P53070 | Yeast | 2,637 | 668 | No |
| P38297 | Yeast | 2,725 | 163 | No |
| Q02883 | Yeast | 0,084 | 416 | No |
| P36013 | Yeast | 2,545 | 416 | No |
| P36060 | Yeast | 0,007 | 290 | No |
| Q06892 | Yeast | 2,266 | 249 | No |
| Q12374 | Yeast | 0,825 | 517 | No |
| P38969 | Yeast | 0,269 | 225 | No |
| P32522 | Yeast | 2,898 | 838 | No |
| P33751 | Yeast | 2,298 | 232 | No |
| P08425 | Yeast | 2,279 | 138 | No |
| P38812 | Yeast | 2,19  | 42  | No |
| P46367 | Yeast | 2,551 | 324 | No |
| P36147 | Yeast | 1,878 | 128 | No |
| P53153 | Yeast | 0,111 | 262 | No |
| Q12029 | Yeast | 2,734 | 228 | No |
| Q12204 | Yeast | 2,78  | 194 | No |
| P27697 | Yeast | 1,82  | 271 | No |
| P40961 | Yeast | 2,372 | 277 | No |
| P09368 | Yeast | 1,329 | 403 | No |
| P32317 | Yeast | 2,854 | 294 | No |
| Q01217 | Yeast | 2,166 | 747 | No |
| P21560 | Yeast | 2,078 | 183 | No |
| Q06011 | Yeast | 0,276 | 76  | No |
| P38300 | Yeast | 2,321 | 204 | No |
| P28737 | Yeast | 1,185 | 353 | No |
| P38958 | Yeast | 0,001 | 93  | No |
| P08468 | Yeast | 2,199 | 673 | No |
| P10355 | Yeast | 2,194 | 209 | No |
| P38796 | Yeast | 2,527 | 206 | No |
| P23833 | Yeast | 0,479 | 224 | No |
| P38825 | Yeast | 1,608 | 624 | No |
| P38851 | Yeast | 2,514 | 726 | No |
| P21592 | Yeast | 0,502 | 310 | No |
| P40012 | Yeast | 1,547 | 528 | No |

|        |       |        |     |     |
|--------|-------|--------|-----|-----|
| Q06683 | Yeast | 2,703  | 684 | No  |
| P80235 | Yeast | 1,975  | 419 | No  |
| P38921 | Yeast | 2,212  | 283 | No  |
| Q06236 | Yeast | 0,723  | 107 | No  |
| P40530 | Yeast | 2,477  | 320 | No  |
| P53170 | Yeast | 2,948  | 314 | No  |
| P32473 | Yeast | 2,97   | 273 | No  |
| Q03713 | Yeast | 1,168  | 126 | No  |
| P53721 | Yeast | 1,434  | 204 | No  |
| P53259 | Yeast | 0,511  | 239 | No  |
| Q02773 | Yeast | 2,464  | 935 | No  |
| P25270 | Yeast | 2,547  | 155 | No  |
| Q07534 | Yeast | 2,282  | 293 | No  |
| P14693 | Yeast | 1,935  | 168 | No  |
| P50110 | Yeast | 1,935  | 312 | No  |
| P37298 | Yeast | 1,136  | 112 | No  |
| Q00711 | Yeast | 2,683  | 587 | No  |
| P21801 | Yeast | 2,152  | 93  | No  |
| P53312 | Yeast | 2,949  | 76  | No  |
| P00927 | Yeast | 1,707  | 346 | No  |
| P46943 | Yeast | 2,621  | 490 | No  |
| P38152 | Yeast | 2,997  | 193 | No  |
| P43122 | Yeast | 2,668  | 157 | No  |
| D6W196 | Yeast | 1,289  | 270 | No  |
| P04803 | Yeast | 2,033  | 252 | No  |
| P48527 | Yeast | 2,259  | 394 | No  |
| P53318 | Yeast | 2,677  | 452 | No  |
| O13525 | Yeast | 1,484  | 316 | No  |
| P53208 | Yeast | 1,252  | 221 | No  |
| P43557 | Yeast | -0,86  | 23  | No  |
| P37267 | Yeast | -0,181 | 138 | Yes |
| P40452 | Yeast | -0,467 | 127 | Yes |
| P35180 | Yeast | -0,493 | 176 | Yes |
| P25573 | Yeast | -1,086 | 360 | Yes |
| Q04472 | Yeast | -0,176 | 424 | Yes |
| P08466 | Yeast | -0,542 | 327 | Yes |
| Q06417 | Yeast | -0,249 | 321 | Yes |
| Q02981 | Yeast | -1,426 | 538 | Yes |
| P33310 | Yeast | -0,189 | 594 | Yes |
| P33311 | Yeast | -0,929 | 657 | Yes |
| P19516 | Yeast | -0,912 | 217 | Yes |
| P40086 | Yeast | -1,602 | 399 | Yes |
| P40416 | Yeast | -0,32  | 584 | Yes |
| Q06493 | Yeast | -0,338 | 319 | Yes |
| Q06668 | Yeast | -0,89  | 366 | Yes |
| Q12171 | Yeast | -1,185 | 492 | Yes |

|        |       |        |     |     |
|--------|-------|--------|-----|-----|
| Q08179 | Yeast | -0,298 | 436 | Yes |
| P32843 | Yeast | -1,079 | 564 | Yes |
| P53220 | Yeast | -2,153 | 165 | Yes |
| P39952 | Yeast | -0,549 | 276 | Yes |
| P39925 | Yeast | -0,619 | 645 | Yes |
| P40341 | Yeast | -0,717 | 647 | Yes |
| P21375 | Yeast | -1,861 | 496 | Yes |
| P39006 | Yeast | -0,509 | 423 | Yes |
| P50085 | Yeast | -0,257 | 273 | Yes |
| Q08023 | Yeast | -0,669 | 502 | Yes |



**Table S4. Chloroplast proteins in the photosynthetic apparatus of *Arabidopsis thaliana*.**

Uniprot ID = the Uniprot identifier of the protein; Encoded = the genome in which the gene is located (plastid or nuclear); Hydro = hydrophobicity (free insertion energy (dG, kcal/mol)) of the selected transmembrane domain; Tail = length of the selected transmembrane domain and the C-terminal tail; SRP Target = the prediction of whether the protein would be a target by SRP.

| <b>Uniprot ID</b> | <b>Encoded</b> | <b>Hydro</b> | <b>Tail</b> | <b>SRP Target</b> |
|-------------------|----------------|--------------|-------------|-------------------|
| P56773            | Plastid        | -0.150       | 183         | Yes               |
| P56774            | Plastid        | -0.930       | 124         | Yes               |
| P56771            | Plastid        | -1.377       | 36          | No                |
| Q9ZR03            | Nuclear        | 0.707        | 161         | No                |
| P61039            | Plastid        | -1.587       | 26          | No                |
| P56775            | Plastid        | -2.118       | 32          | No                |
| P83755            | Plastid        | -0.922       | 326         | Yes               |
| P56761            | Plastid        | -0.646       | 325         | Yes               |
| P56778            | Plastid        | -2.242       | 313         | Yes               |
| P56777            | Plastid        | -0.262       | 412         | Yes               |
| P56779            | Plastid        | -0.291       | 66          | No                |
| P62095            | Plastid        | 1.902        | 30          | No                |
| P60129            | Plastid        | -3.299       | 22          | No                |
| P56781            | Plastid        | -2.472       | 30          | No                |
| P56782            | Plastid        | -0.261       | 25          | No                |
| P62109            | Plastid        | -3.023       | 29          | No                |
| P56780            | Plastid        | -0.565       | 36          | No                |
| P62100            | Plastid        | -3.234       | 34          | No                |
| Q9S841            | Nuclear        | 2.221        | 267         | No                |
| Q42029            | Nuclear        | 1.400        | 166         | No                |
| Q9XI73            | Nuclear        | 0.914        | 147         | No                |
| P27202            | Nuclear        | -1.206       | 29          | No                |
| Q9XF91            | Nuclear        | -1.515       | 133         | Yes               |
| P61839            | Plastid        | -2.970       | 30          | No                |
| Q39194            | Nuclear        | -2.586       | 33          | No                |
| O49347            | Nuclear        | -0.363       | 34          | No                |
| P56790            | Plastid        | -1.425       | 61          | No                |
| Q9LR64            | Nuclear        | 2.233        | 135         | No                |
| Q8W0Y8            | Nuclear        | N/A          | 0           | No                |
| P56766            | Plastid        | -2.200       | 594         | Yes               |
| P56767            | Plastid        | -1.801       | 599         | Yes               |
| P62090            | Plastid        | N/A          | N/A         | No                |
| Q9SA56            | Nuclear        | N/A          | N/A         | No                |
| Q9S714            | Nuclear        | 2.957        | 144         | No                |
| Q9SHE8            | Nuclear        | -0.104       | 71          | No                |
| Q9S7N7            | Nuclear        | 1.155        | 98          | No                |
| Q9SUI6            | Nuclear        | 0.657        | 43          | No                |
| P56768            | Plastid        | 0.340        | 30          | No                |
| P56769            | Plastid        | 0.898        | 31          | No                |

|            |         |        |     |     |
|------------|---------|--------|-----|-----|
| Q9SUI5     | Nuclear | 1.127  | 75  | No  |
| Q9SUI4     | Nuclear | -0.803 | 85  | No  |
| P49107     | Nuclear | 1.497  | 118 | No  |
| Q949Q5     | Nuclear | -1.677 | 30  | No  |
| P42699     | Nuclear | 1.259  | 125 | No  |
| O04090     | Nuclear | N/A    | N/A | No  |
| Q8W493     | Nuclear | 2.063  | 132 | No  |
| Q93VA3     | Nuclear | 2.642  | 132 | No  |
| P19366     | Plastid | N/A    | N/A | No  |
| P56757     | Plastid | N/A    | N/A | No  |
| Q01909     | Nuclear | N/A    | N/A | No  |
| Q9SSS9     | Nuclear | 2.904  | 49  | No  |
| P09468     | Plastid | 2.246  | 84  | No  |
| P56760     | Plastid | -1.622 | 28  | No  |
| P56758     | Plastid | -1.434 | 208 | Yes |
| P93303     | Plastid | -2.179 | 151 | Yes |
| Q01667     | Nuclear | 0.591  | 108 | No  |
| P0CJ48     | Nuclear | 1.336  | 109 | No  |
| Q9SKT0     | Nuclear | 1.945  | 104 | No  |
| A0A023PKQ4 | Plastid | -1.736 | 25  | No  |
| B6ZHE7     | Nuclear | 1.885  | 178 | No  |

**Table S5.** SF-domains assigned to MitoCOGs. Proteins which were grouped as hypothetical proteins according to MitoCOG clustering are highlighted in bold

| MitoCOG-ID         | Protein length |             | MitoCOG Description                | SF Classification | SF Description                                                                |
|--------------------|----------------|-------------|------------------------------------|-------------------|-------------------------------------------------------------------------------|
|                    | min            | max         |                                    |                   |                                                                               |
| MitoCOG0001        | 166            | 805         | NADH dehydrogenase subunit 2       | f.33.1            | Calcium ATPase, transmembrane domain M                                        |
| MitoCOG0002        | 400            | 873         | cytochrome c oxidase subunit 1     | f.24.1            | Cytochrome c oxidase subunit I-like                                           |
| MitoCOG0002        | 400            | 873         | cytochrome c oxidase subunit 1     | b.6.1             | Cupredoxins                                                                   |
| MitoCOG0002        | 400            | 873         | cytochrome c oxidase subunit 1     | f.17.2            | Cytochrome c oxidase subunit II-like, transmembrane region                    |
| MitoCOG0002        | 400            | 873         | cytochrome c oxidase subunit 1     | d.95.2            | Homing endonucleases                                                          |
| MitoCOG0003        | 130            | 1296        | cytochrome c oxidase subunit 2     | b.6.1             | Cupredoxins                                                                   |
| MitoCOG0003        | 130            | 1296        | cytochrome c oxidase subunit 2     | f.17.2            | Cytochrome c oxidase subunit II-like, transmembrane region                    |
| MitoCOG0003        | 130            | 1296        | cytochrome c oxidase subunit 2     | d.95.2            | Homing endonucleases                                                          |
| MitoCOG0003        | 130            | 1296        | cytochrome c oxidase subunit 2     | h.1.5             | Tropomyosin                                                                   |
| MitoCOG0004        | 112            | 410         | ATP synthase subunit 6             | f.18.1            | F1F0 ATP synthase subunit A                                                   |
| MitoCOG0005        | 212            | 441         | cytochrome c oxidase subunit 3     | f.25.1            | Cytochrome c oxidase subunit III-like                                         |
| MitoCOG0006        | 86             | 567         | NADH dehydrogenase subunit 3       | f.24.1            | Cytochrome c oxidase subunit I-like                                           |
| MitoCOG0008        | 134            | 770         | NADH dehydrogenase subunit 4       | f.4.3             | Porins                                                                        |
| MitoCOG0011        | 196            | 497         | cytochrome b                       | f.21.1            | Transmembrane di-heme cytochromes                                             |
| MitoCOG0011        | 196            | 497         | cytochrome b                       | f.32.1            | a domain/subunit of cytochrome bc1 complex (Ubiquinol-cytochrome c reductase) |
| MitoCOG0013        | 138            | 1057        | LAGLIDADG endonuclease             | d.95.2            | Homing endonucleases                                                          |
| MitoCOG0013        | 138            | 1057        | LAGLIDADG endonuclease             | f.24.1            | Cytochrome c oxidase subunit I-like                                           |
| MitoCOG0013        | 138            | 1057        | LAGLIDADG endonuclease             | f.21.1            | Transmembrane di-heme cytochromes                                             |
| MitoCOG0013        | 138            | 1057        | LAGLIDADG endonuclease             | e.8.1             | DNA/RNA polymerases                                                           |
| MitoCOG0014        | 54             | 203         | ATP synthase subunit 9             | f.17.1            | F1F0 ATP synthase subunit C                                                   |
| MitoCOG0015        | 979            | 1021        | DNA mismatch repair protein MutS   | a.113.1           | DNA repair protein MutS, domain III                                           |
| MitoCOG0015        | 979            | 1021        | DNA mismatch repair protein MutS   | c.37.1            | P-loop containing nucleoside triphosphate hydrolases                          |
| MitoCOG0015        | 979            | 1021        | DNA mismatch repair protein MutS   | d.75.2            | DNA repair protein MutS, domain I                                             |
| MitoCOG0016        | 745            | 905         | reverse transcriptase and maturase | e.8.1             | DNA/RNA polymerases                                                           |
| <b>MitoCOG0017</b> | <b>501</b>     | <b>677</b>  | <b>hypothetical protein</b>        | <b>d.95.2</b>     | <b>Homing endonucleases</b>                                                   |
| MitoCOG0018        | 106            | 1042        | DNA polymerase                     | e.8.1             | DNA/RNA polymerases                                                           |
| MitoCOG0018        | 106            | 1042        | DNA polymerase                     | c.55.3            | Ribonuclease H-like                                                           |
| MitoCOG0019        | 100            | 1065        | reverse transcriptase              | e.8.1             | DNA/RNA polymerases                                                           |
| MitoCOG0019        | 100            | 1065        | reverse transcriptase              | f.24.1            | Cytochrome c oxidase subunit I-like                                           |
| MitoCOG0019        | 100            | 1065        | reverse transcriptase              | f.21.1            | Transmembrane di-heme cytochromes                                             |
| MitoCOG0020        | 558            | 745         | reverse transcriptase              | e.8.1             | DNA/RNA polymerases                                                           |
| MitoCOG0025        | 151            | 371         | ribosomal protein S3               | d.53.1            | Ribosomal protein S3 C-terminal domain                                        |
| MitoCOG0025        | 151            | 371         | ribosomal protein S3               | d.52.3            | Prokaryotic type KH domain (KH-domain type II)                                |
| MitoCOG0026        | 64             | 130         | ribosomal protein S19              | d.28.1            | Ribosomal protein S19                                                         |
| MitoCOG0027        | 133            | 521         | ribosomal protein L2               | b.40.4            | Nucleic acid-binding proteins                                                 |
| MitoCOG0027        | 133            | 521         | ribosomal protein L2               | b.34.5            | Translation proteins SH3-like domain                                          |
| MitoCOG0029        | 154            | 182         | NADH dehydrogenase subunit 10      | e.19.1            | HydA/Nqo6-like                                                                |
| MitoCOG0030        | 79             | 215         | ribosomal protein S12              | b.40.4            | Nucleic acid-binding proteins                                                 |
| MitoCOG0031        | 155            | 443         | NADH dehydrogenase subunit 7       | e.8.1             | HydB/Nqo4-like                                                                |
| <b>MitoCOG0032</b> | <b>175</b>     | <b>179</b>  | <b>hypothetical protein</b>        | <b>d.141.1</b>    | <b>Ribosomal protein L6</b>                                                   |
| <b>MitoCOG0033</b> | <b>234</b>     | <b>330</b>  | <b>hypothetical protein</b>        | <b>d.53.1</b>     | <b>Ribosomal protein S3 C-terminal domain</b>                                 |
| <b>MitoCOG0036</b> | <b>273</b>     | <b>314</b>  | <b>hypothetical protein</b>        | <b>a.75.1</b>     | <b>Ribosomal protein S7</b>                                                   |
| MitoCOG0039        | 133            | 302         | ribosomal protein L16              | d.41.4            | Ribosomal protein L16p/L10e                                                   |
| MitoCOG0043        | 177            | 287         | NADH dehydrogenase subunit 9       | d.307.1           | Nqo5-like                                                                     |
| MitoCOG0043        | 177            | 287         | NADH dehydrogenase subunit 9       | g.39.1            | Glucocorticoid receptor-like (DNA-binding domain)                             |
| <b>MitoCOG0044</b> | <b>1260</b>    | <b>1636</b> | <b>hypothetical protein</b>        | <b>d.53.1</b>     | <b>Ribosomal protein S3 C-terminal domain</b>                                 |
| MitoCOG0048        | 100            | 178         | ribosomal protein L14              | b.39.1            | Ribosomal protein L14                                                         |
| MitoCOG0051        | 95             | 282         | succinate dehydrogenase subunit 3  | f.21.2            | Fumarate reductase respiratory complex transmembrane subunits                 |
| MitoCOG0052        | 235            | 270         | succinate dehydrogenase subunit 2  | a.1.2             | alpha-helical ferredoxin                                                      |
| MitoCOG0052        | 235            | 270         | succinate dehydrogenase subunit 2  | d.15.4            | 2Fe-2S ferredoxin-like                                                        |
| MitoCOG0053        | 99             | 307         | ribosomal protein L6               | d.141.1           | Ribosomal protein L6                                                          |
| MitoCOG0054        | 113            | 593         | ribosomal protein S11              | c.55.4            | Translational machinery components                                            |
| MitoCOG0055        | 87             | 119         | ribosomal protein S14              | g.39.1            | Glucocorticoid receptor-like (DNA-binding domain)                             |
| MitoCOG0056        | 186            | 1775        | ribosomal protein S3               | d.53.1            | Ribosomal protein S3 C-terminal domain                                        |
| MitoCOG0056        | 186            | 1775        | ribosomal protein S3               | d.52.3            | Prokaryotic type KH domain (KH-domain type II)                                |
| MitoCOG0058        | 119            | 919         | LAGLIDADG endonuclease             | d.95.2            | Homing endonucleases                                                          |
| MitoCOG0058        | 119            | 919         | LAGLIDADG endonuclease             | d.285.1           | DNA-binding domain of intron-encoded endonucleases                            |
| MitoCOG0058        | 119            | 919         | LAGLIDADG endonuclease             | f.21.1            | Transmembrane di-heme cytochromes                                             |

|                    |            |            |                                        |                |                                                                                                    |
|--------------------|------------|------------|----------------------------------------|----------------|----------------------------------------------------------------------------------------------------|
| MitoCOG0059        | 490        | 816        | ATP synthase subunit 1                 | c.37.1         | P-loop containing nucleoside triphosphate hydrolases                                               |
| MitoCOG0059        | 490        | 816        | ATP synthase subunit 1                 | a.69.1         | C-terminal domain of alpha and beta subunits of F1 ATP synthase                                    |
| MitoCOG0059        | 490        | 816        | ATP synthase subunit 1                 | b.49.1         | N-terminal domain of alpha and beta subunits of F1 ATP synthase                                    |
| MitoCOG0060        | 140        | 339        | ribosomal protein L11                  | d.47.1         | Ribosomal L11/L12e N-terminal domain                                                               |
| MitoCOG0060        | 140        | 339        | ribosomal protein L11                  | a.4.7          | Ribosomal protein L11, C-terminal domain                                                           |
| MitoCOG0061        | 111        | 407        | ribosomal protein S7                   | a.75.1         | Ribosomal protein S7                                                                               |
| <b>MitoCOG0062</b> | <b>389</b> | <b>843</b> | <b>hypothetical protein</b>            | <b>d.52.3</b>  | <b>Prokaryotic type KH domain (KH-domain type II)</b>                                              |
| MitoCOG0063        | 122        | 159        | ribosomal protein S8                   | d.140.1        | Ribosomal protein S8                                                                               |
| MitoCOG0064        | 102        | 276        | ribosomal protein S13                  | a.156.1        | S13-like H2TH domain                                                                               |
| MitoCOG0066        | 200        | 749        | NADH dehydrogenase subunit 11          | d.58.1         | 4Fe-4S ferredoxins                                                                                 |
| MitoCOG0066        | 200        | 749        | NADH dehydrogenase subunit 11          | c.81.1         | Formate dehydrogenase/DMSO reductase, domains 1-3                                                  |
| MitoCOG0066        | 200        | 749        | NADH dehydrogenase subunit 11          | d.15.4         | 2Fe-2S ferredoxin-like                                                                             |
| MitoCOG0067        | 153        | 1641       | ribosomal protein S4                   | d.66.1         | Alpha-L RNA-binding motif                                                                          |
| MitoCOG0068        | 121        | 773        | LAGLIDADG endonuclease                 | d.95.2         | Homing endonucleases                                                                               |
| MitoCOG0069        | 159        | 170        | LAGLIDADG endonuclease                 | d.95.2         | Homing endonucleases                                                                               |
| MitoCOG0070        | 74         | 118        | ribosomal protein L20                  | a.144.2        | Ribosomal protein L20                                                                              |
| MitoCOG0071        | 145        | 163        | NADH dehydrogenase subunit 8           | d.58.1         | 4Fe-4S ferredoxins                                                                                 |
| MitoCOG0072        | 91         | 377        | ribosomal protein S10                  | d.58.15        | Ribosomal protein S10                                                                              |
| MitoCOG0073        | 129        | 278        | ribosomal protein L5                   | d.77.1         | RL5-like                                                                                           |
| MitoCOG0074        | 105        | 473        | ribosomal protein S1                   | b.40.4         | Nucleic acid-binding proteins                                                                      |
| MitoCOG0075        | 79         | 144        | succinate dehydrogenase subunit 4      | f.21.2         | Fumarate reductase respiratory complex transmembrane subunits                                      |
| <b>MitoCOG0077</b> | <b>139</b> | <b>143</b> | <b>hypothetical protein</b>            | <b>d.58.62</b> | <b>Ribosomal protein L10-like</b>                                                                  |
| MitoCOG0080        | 182        | 559        | ribosomal protein S2                   | c.23.15        | Ribosomal protein S2                                                                               |
| MitoCOG0082        | 66         | 76         | ribosomal protein L31                  | d.325.1        | L28p-like                                                                                          |
| MitoCOG0088        | 401        | 949        | maturase                               | e.8.1          | DNA/RNA polymerases                                                                                |
| <b>MitoCOG0090</b> | <b>199</b> | <b>315</b> | <b>hypothetical protein</b>            | <b>f.17.1</b>  | <b>F1F0 ATP synthase subunit C</b>                                                                 |
| <b>MitoCOG0090</b> | <b>199</b> | <b>315</b> | <b>hypothetical protein</b>            | <b>f.21.1</b>  | <b>Transmembrane di-heme cytochromes</b>                                                           |
| MitoCOG0091        | 202        | 845        | reverse transcriptase                  | e.8.1          | DNA/RNA polymerases                                                                                |
| MitoCOG0092        | 126        | 193        | ribosomal protein L10                  | d.58.62        | Ribosomal protein L10-like                                                                         |
| MitoCOG0093        | 49         | 699        | LAGLIDADG endonuclease                 | d.226.1        | GIY-YIG endonuclease                                                                               |
| MitoCOG0093        | 49         | 699        | LAGLIDADG endonuclease                 | d.285.1        | DNA-binding domain of intron-encoded endonucleases                                                 |
| MitoCOG0096        | 104        | 1204       | RNA polymerase                         | e.8.1          | DNA/RNA polymerases                                                                                |
| <b>MitoCOG0101</b> | <b>111</b> | <b>490</b> | <b>hypothetical protein</b>            | <b>e.8.1</b>   | <b>DNA/RNA polymerases</b>                                                                         |
| MitoCOG0116        | 173        | 473        | LAGLIDADG endonuclease                 | d.226.1        | GIY-YIG endonuclease                                                                               |
| MitoCOG0117        | 206        | 763        | LAGLIDADG endonuclease                 | d.95.2         | Homing endonucleases                                                                               |
| MitoCOG0117        | 206        | 763        | LAGLIDADG endonuclease                 | f.24.1         | Cytochrome c oxidase subunit I-like                                                                |
| MitoCOG0118        | 174        | 399        | LAGLIDADG endonuclease                 | d.226.1        | GIY-YIG endonuclease                                                                               |
| MitoCOG0118        | 174        | 399        | LAGLIDADG endonuclease                 | f.24.1         | Cytochrome c oxidase subunit I-like                                                                |
| MitoCOG0119        | 222        | 267        | RNA polymerase subunit alpha           | d.181.1        | Insert subdomain of RNA polymerase alpha subunit                                                   |
| MitoCOG0119        | 222        | 267        | RNA polymerase subunit alpha           | d.74.3         | RBP11-like subunits of RNA polymerase beta and beta-prime subunits of DNA dependent RNA-polymerase |
| MitoCOG0120        | 1362       | 2640       | RNA polymerase subunit beta            | e.29.1         | beta and beta-prime subunits of DNA dependent RNA-polymerase                                       |
| MitoCOG0121        | 1316       | 2166       | RNA polymerase subunit beta-Prime      | e.29.1         | beta and beta-prime subunits of DNA dependent RNA-polymerase                                       |
| MitoCOG0122        | 518        | 654        | RNA polymerase sigma factor            | a.177.1        | Sigma2 domain of RNA polymerase sigma factors                                                      |
| MitoCOG0122        | 518        | 654        | RNA polymerase sigma factor            | a.4.13         | Sigma3 and sigma4 domains of RNA polymerase sigma factors                                          |
| MitoCOG0124        | 70         | 70         | ribosomal protein L35                  | d.301.1        | L35p-like                                                                                          |
| MitoCOG0126        | 41         | 41         | ribosomal protein L36                  | g.42.1         | Ribosomal protein L36                                                                              |
| MitoCOG0127        | 84         | 84         | ribosomal protein S16                  | d.27.1         | Ribosomal protein S16                                                                              |
| MitoCOG0128        | 176        | 222        | cytochrome oxidase assembly protein 11 | b.146.1        | Ctag/Cox11                                                                                         |
| MitoCOG0129        | 410        | 419        | SecY-type transporter protein          | f.41.1         | Preprotein translocase SecY subunit                                                                |
| MitoCOG0130        | 394        | 400        | elongation factor Tu                   | c.37.1         | P-loop containing nucleoside triphosphate hydrolases                                               |
| MitoCOG0130        | 394        | 400        | elongation factor Tu                   | b.44.1         | EF-Tu/eEF-1alpha/eIF2-gamma C-terminal domain                                                      |
| MitoCOG0130        | 394        | 400        | elongation factor Tu                   | b.43.3         | Translation proteins                                                                               |
| MitoCOG0132        | 193        | 222        | cytochrome c biogenesis protein ccmA   | c.37.1         | P-loop containing nucleoside triphosphate hydrolases                                               |
| MitoCOG0133        | 275        | 288        | ATP synthase subunit 3                 | c.49.2         | ATP synthase (F1-ATPase), gamma subunit                                                            |
| MitoCOG0134        | 48         | 62         | ribosomal protein L32                  | g.41.8         | Zn-binding ribosomal proteins                                                                      |
| MitoCOG0136        | 81         | 102        | ribosomal protein L27                  | b.84.4         | Ribosomal L27 protein-like                                                                         |
| MitoCOG0137        | 86         | 118        | ribosomal protein L19                  | b.34.5         | Translation proteins SH3-like domain                                                               |
| MitoCOG0138        | 93         | 118        | ribosomal protein L18                  | c.55.4         | Translational machinery components                                                                 |
| MitoCOG0139        | 218        | 226        | ribosomal protein L1                   | e.24.1         | Ribosomal protein L1                                                                               |

**Table S6.** Source species from which protein SF-domains were analysed in this study

|                                                                                                        | Genome                        | Genome Size (kb) | Number of proteins |
|--------------------------------------------------------------------------------------------------------|-------------------------------|------------------|--------------------|
| <b>A. Flux analysis in Eukaryotes and Bacteria</b>                                                     |                               |                  |                    |
| 1                                                                                                      | <i>R. prowazekii</i>          | -                | 843                |
| 2                                                                                                      | <i>Ca. Pelagibacter</i>       | -                | 1447               |
| 3                                                                                                      | <i>C. Puniceispirillum</i>    | -                | 2543               |
| 4                                                                                                      | <i>D. vulgaris</i>            | -                | 3091               |
| 5                                                                                                      | <i>G. daltonii</i>            | -                | 3798               |
| 6                                                                                                      | <i>T. parva</i>               | -                | 4079               |
| 7                                                                                                      | <i>E. coli</i>                | -                | 4228               |
| 8                                                                                                      | <i>M. magneticum</i>          | -                | 4561               |
| 9                                                                                                      | <i>P. brasiliensis</i>        | -                | 4750               |
| 10                                                                                                     | <i>R. palustris</i>           | -                | 4878               |
| 11                                                                                                     | <b><i>S. pombe</i></b>        | -                | 5035               |
| 12                                                                                                     | <i>P. pastoris</i>            | -                | 5040               |
| 13                                                                                                     | <i>B. mallei</i>              | -                | 5184               |
| 14                                                                                                     | <i>A. tumefaciens</i>         | -                | 5355               |
| 15                                                                                                     | <b><i>P. falciparum</i></b>   | -                | 5385               |
| 16                                                                                                     | <i>Y. lipolytica</i>          | -                | 6448               |
| 17                                                                                                     | <i>U. maydis</i>              | -                | 6522               |
| 18                                                                                                     | <b><i>S. cerevisiae</i></b>   | -                | 6692               |
| 19                                                                                                     | <i>M. xanthus</i>             | -                | 7316               |
| 20                                                                                                     | <i>O. sp</i>                  | -                | 7773               |
| 21                                                                                                     | <i>C. Solibacter</i>          | -                | 7826               |
| 22                                                                                                     | <i>T. gondii</i>              | -                | 7993               |
| 23                                                                                                     | <i>B. bovis</i>               | -                | 8029               |
| 24                                                                                                     | <i>L. major</i>               | -                | 8408               |
| 25                                                                                                     | <i>A. niger</i>               | -                | 8592               |
| 26                                                                                                     | <i>B. dendrobatidis</i>       | -                | 8818               |
| 27                                                                                                     | <i>M. brevicollis</i>         | -                | 9196               |
| 28                                                                                                     | <i>T. brucei</i>              | -                | 9826               |
| 29                                                                                                     | <i>C. vulgaris</i>            | -                | 9994               |
| 30                                                                                                     | <i>P. tricornutum</i>         | -                | 10402              |
| 31                                                                                                     | <i>A. anophagefferens</i>     | -                | 11501              |
| 32                                                                                                     | <i>T. adhaerens</i>           | -                | 11520              |
| 33                                                                                                     | <i>T. pseudonana</i>          | -                | 11776              |
| 34                                                                                                     | <i>P. pallidum.</i>           | -                | 12356              |
| 35                                                                                                     | <i>S. mansoni</i>             | -                | 13191              |
| 36                                                                                                     | <i>D. discoideum</i>          | -                | 13263              |
| 37                                                                                                     | <i>P. blakesleeanus</i>       | -                | 14792              |
| 38                                                                                                     | <i>A. castellan</i>           | -                | 14944              |
| 39                                                                                                     | <i>V. carteri</i>             | -                | 15544              |
| 40                                                                                                     | <i>N. gruberi</i>             | -                | 15753              |
| 41                                                                                                     | <i>I. scapularis</i>          | -                | 20486              |
| 42                                                                                                     | <i>L. bicolor</i>             | -                | 20614              |
| 43                                                                                                     | <i>B. malayi</i>              | -                | 21252              |
| 44                                                                                                     | <b><i>D. melanogaster</i></b> | -                | 23849              |
| 45                                                                                                     | <b><i>T. thermophila</i></b>  | -                | 24725              |
| 46                                                                                                     | <i>A. mellifera</i>           | -                | 27755              |
| <b>B. MitoMiner source organisms</b>                                                                   |                               |                  |                    |
| 1                                                                                                      | <b><i>B. taurus</i></b>       |                  |                    |
| 2                                                                                                      | <b><i>M. musculus</i></b>     |                  |                    |
| 3                                                                                                      | <b><i>R. norvegicus</i></b>   |                  |                    |
| 4                                                                                                      | <b><i>N. crassa</i></b>       |                  |                    |
| 5                                                                                                      | <b><i>T. thermophila</i></b>  |                  |                    |
| 6                                                                                                      | <b><i>G. lamlia</i></b>       |                  |                    |
| <b>Note:</b> In addition to list B, species in bold in list A were part of the MitoMiner reference set |                               |                  |                    |

**Table S7.** Description of OXPHOS genes, the complex they are found in and the SF-domain assigned to them as in fig. 4

| Human Gene            | Complex | SF classification | SF description                                                            |
|-----------------------|---------|-------------------|---------------------------------------------------------------------------|
| <b>Central</b>        |         |                   |                                                                           |
| NDUFS1;SDHB           | C1, C2  | d.15.4            | 2Fe-2S ferredoxin-like                                                    |
| NDUFA10;ATP5A1;ATP5B  | C1, C5  | c.37.1            | P-loop containing nucleoside triphosphate hydrolases                      |
| NDUFA9                | C1      | c.2.1             | NAD(P)-binding Rossmann-fold domains                                      |
| NDUFAB1               | C1      | a.28.1            | ACP-like                                                                  |
| NDUFS1;NDUFS8         | C1      | d.58.1            | 4Fe-4S ferredoxins                                                        |
| NDUFS1                | C1      | c.81.1            | Formate dehydrogenase/DMSO reductase, domains 1-3                         |
| NDUFS2                | C1      | e.18.1            | HydB/Nqo4-like                                                            |
| NDUFS3                | C1      | d.307.1           | Nqo5-like                                                                 |
| NDUFS7                | C1      | e.19.1            | HydA/Nqo6-like                                                            |
| NDUFV1                | C1      | c.142.1           | Nqo1 FMN-binding domain-like                                              |
| NDUFV1                | C1      | d.15.13           | Nqo1 middle domain-like                                                   |
| NDUFV1                | C1      | a.29.12           | Nqo1C-terminal domain-like                                                |
| SDHA                  | C2      | c.3.1             | FAD/NAD(P)-binding domain                                                 |
| SDHA                  | C2      | a.7.3             | Succinate dehydrogenase/fumarate reductase flavoprotein C-terminal domain |
| SDHA                  | C2      | d.168.1           | Succinate dehydrogenase/fumarate reductase flavoprotein, catalytic domain |
| SDHB                  | C2      | a.1.2             | alpha-helical ferredoxin                                                  |
| SDHC;SDHD             | C2      | f.21.2            | Fumarate reductase respiratory complex transmembrane subunits             |
| CYC1                  | C3      | a.3.1             | Cytochrome c                                                              |
| CYC1                  | C3      | f.23.11           | Cytochrome c1 subunit of cytochrome bc1 complex, transmembrane anchor     |
| MT-CYB                | C3      | f.32.1            | a domain/subunit of cytochrome bc1 complex                                |
| MT-CYB                | C3      | f.21.1            | Transmembrane di-heme cytochromes                                         |
| UQCRC1;UQCRC2         | C3      | d.185.1           | LuxS/MPP-like metallohydrolase                                            |
| UQCRFS1               | C3      | b.33.1            | ISP domain                                                                |
| UQCRFS1               | C3      | f.23.12           | ISP transmembrane anchor                                                  |
| UQCRFS1               | C3      | d.184.1           | Non-globular alpha+beta subunits of globular proteins                     |
| MT-CO1                | C4      | f.24.1            | Cytochrome c oxidase subunit I-like                                       |
| MT-CO2                | C4      | b.6.1             | Cupredoxins                                                               |
| MT-CO2                | C4      | f.17.2            | Cytochrome c oxidase subunit II-like, transmembrane region                |
| MT-CO3                | C4      | f.25.1            | Cytochrome c oxidase subunit III-like                                     |
| ATP5A1;ATP5B          | C5      | a.69.1            | C-terminal domain of alpha and beta subunits of F1 ATP synthase           |
| ATP5A1;ATP5B          | C5      | b.49.1            | N-terminal domain of alpha and beta subunits of F1 ATP synthase           |
| ATP5C1                | C5      | c.49.2            | ATP synthase (F1-ATPase), gamma subunit                                   |
| ATP5D                 | C5      | a.2.10            | Epsilon subunit of F1F0-ATP synthase C-terminal domain                    |
| ATP5D                 | C5      | b.93.1            | Epsilon subunit of F1F0-ATP synthase N-terminal domain                    |
| ATP5E                 | C5      | a.137.8           | Epsilon subunit of mitochondrial F1F0-ATP synthase                        |
| ATP5F1                | C5      | f.52.1            | ATP synthase B chain-like                                                 |
| ATP5G1;ATP5G2;ATP5G3  | C5      | f.17.1            | F1F0 ATP synthase subunit C                                               |
| ATP5O                 | C5      | a.70.1            | N-terminal domain of the delta subunit of the F1F0-ATP synthase           |
| MT-ATP6               | C5      | f.18.1            | F1F0 ATP synthase subunit A                                               |
| <b>Accessory</b>      |         |                   |                                                                           |
| NDUFA2;NDUFV2         | C1      | c.47.1            | Thioredoxin-like                                                          |
| UQCRB                 | C3      | f.27.1            | 14 kDa protein of cytochrome bc1 complex                                  |
| UQCRH                 | C3      | f.28.1            | Non-heme 11 kDa protein of cytochrome bc1 complex                         |
| COX5A                 | C4      | a.118.11          | Cytochrome c oxidase subunit E                                            |
| COX5B                 | C4      | g.41.5            | Rubredoxin-like                                                           |
| COX6B1;COX6B2         | C4      | a.51.1            | Cytochrome c oxidase subunit h                                            |
| ATP5H                 | C5      | f.53.1            | ATP synthase D chain-like                                                 |
| ATP5J                 | C5      | f.45.1            | Mitochondrial ATP synthase coupling factor 6                              |
| ATPIF1                | C5      | h.4.8             | F1 ATPase inhibitor, IF1, C-terminal domain                               |
| <b>Accessory STMD</b> |         |                   |                                                                           |
| UQCR10                | C3      | f.23.14           | Subunit X (non-heme 7 kDa protein) of cytochrome bc1 complex              |
| UQCR11                | C3      | f.23.15           | Subunit XI (6.4 kDa protein) of cytochrome bc1 complex                    |
| UQCRCQ                | C3      | f.23.13           | Ubiquinone-binding protein QP-C of cytochrome bc1 complex                 |
| COX4I1;COX4I2         | C4      | f.23.1            | Mitochondrial cytochrome c oxidase subunit IV                             |
| COX6A1;COX6A2         | C4      | f.23.2            | Mitochondrial cytochrome c oxidase subunit VIa                            |
| COX6C                 | C4      | f.23.3            | Mitochondrial cytochrome c oxidase subunit VIc                            |
| COX7A1;COX7A2         | C4      | f.23.4            | Mitochondrial cytochrome c oxidase subunit VIIa                           |
| COX7B;COX7B2          | C4      | f.23.5            | Mitochondrial cytochrome c oxidase subunit VIIb                           |
| COX7C                 | C4      | f.23.6            | Mitochondrial cytochrome c oxidase subunit VIIc (aka VIIIa)               |
| COX8A;COX8C           | C4      | f.23.7            | Mitochondrial cytochrome c oxidase subunit VIIIb (aka IX)                 |
| MT-ATP8               | C5      | a.118.3           | Sec7 domain                                                               |

**Table S8.** Description of mitochondria associated SF-domans that do not have any known bacterial homologs. The columns in order from left to right indicate the broad function al category of a SF-domain, the SCOP classification, SCOP description of SF, number of speices in which a protein with the corresponding SF-domain was experimentally identified and the corresponding species. The species names are described in the legend at the end of the table.

| Function                                                                                                            | SF classification | SF description                                                                       | No. Species | Species                                                            |
|---------------------------------------------------------------------------------------------------------------------|-------------------|--------------------------------------------------------------------------------------|-------------|--------------------------------------------------------------------|
| <b>105 mitochondria associated SFs traced back to MCA that do not have any known bacterial homologs as in fig 5</b> |                   |                                                                                      |             |                                                                    |
| Information                                                                                                         | d.58.12           | eEF-1beta-like                                                                       | 9           | BOVIN, DROME, NEUCR, ARATH, SCHPO, YEAST, RAT, HUMAN, MOUSE        |
| Information                                                                                                         | d.58.46           | eEF1-gamma domain                                                                    | 9           | BOVIN, DROME, NEUCR, ARATH, YEAST, RAT, HUMAN, PLAF7, MOUSE        |
| Information                                                                                                         | a.144.1           | PABC (PABP) domain                                                                   | 9           | BOVIN, HUMAN, YEAST, ARATH, SCHPO, RAT, NEUCR, PLAF7, MOUSE        |
| Information                                                                                                         | b.34.9            | Tudor/PWWP/MBT                                                                       | 8           | BOVIN, DROME, NEUCR, ARATH, SCHPO, RAT, HUMAN, MOUSE               |
| Information                                                                                                         | c.52.2            | tRNA-intron endonuclease catalytic domain-like                                       | 7           | BOVIN, HUMAN, YEAST, SCHPO, RAT, NEUCR, MOUSE                      |
| Information                                                                                                         | a.11.2            | Second domain of FERM                                                                | 5           | BOVIN, RAT, MOUSE, HUMAN, DROME                                    |
| Information                                                                                                         | a.160.1           | PAP/OAS1 substrate-binding domain                                                    | 5           | BOVIN, RAT, MOUSE, HUMAN, DROME                                    |
| Information                                                                                                         | d.23.1            | Tubby C-terminal domain-like                                                         | 2           | SCHPO, YEAST                                                       |
| Information                                                                                                         | g.44.1            | RING/U-box                                                                           | 1           | SCHPO                                                              |
| Information                                                                                                         | g.50.1            | FYVE/PHD zinc finger                                                                 | 1           | YEAST                                                              |
| Metabolism                                                                                                          | f.23.12           | ISP transmembrane anchor                                                             | 10          | BOVIN, DROME, NEUCR, ARATH, SCHPO, YEAST, RAT, HUMAN, PLAF7, MOUSE |
| Metabolism                                                                                                          | b.69.6            | Clathrin heavy-chain terminal domain                                                 | 9           | BOVIN, DROME, NEUCR, ARATH, SCHPO, YEAST, RAT, HUMAN, MOUSE        |
| Metabolism                                                                                                          | a.29.5            | alpha-ketoacid dehydrogenase kinase, N-terminal domain                               | 9           | BOVIN, DROME, NEUCR, ARATH, SCHPO, YEAST, RAT, HUMAN, MOUSE        |
| Metabolism                                                                                                          | a.51.1            | Cytochrome c oxidase subunit h                                                       | 9           | BOVIN, DROME, NEUCR, ARATH, SCHPO, YEAST, RAT, HUMAN, MOUSE        |
| Metabolism                                                                                                          | d.120.1           | Cytochrome b5-like heme/steroid binding domain                                       | 9           | BOVIN, DROME, NEUCR, ARATH, SCHPO, YEAST, RAT, HUMAN, MOUSE        |
| Metabolism                                                                                                          | f.27.1            | 14 kDa protein of cytochrome bc1 complex (Ubiquinol-cytochrome c reductase)          | 8           | BOVIN, DROME, NEUCR, YEAST, SCHPO, RAT, HUMAN, MOUSE               |
| Metabolism                                                                                                          | a.24.15           | FAD-dependent thiol oxidase                                                          | 8           | BOVIN, DROME, NEUCR, YEAST, SCHPO, RAT, HUMAN, MOUSE               |
| Metabolism                                                                                                          | c.131.1           | Peptidyl-tRNA hydrolase II                                                           | 8           | BOVIN, DROME, YEAST, ARATH, SCHPO, RAT, HUMAN, MOUSE               |
| Metabolism                                                                                                          | a.227.1           | ERO1-like                                                                            | 8           | BOVIN, HUMAN, YEAST, ARATH, SCHPO, RAT, NEUCR, MOUSE               |
| Metabolism                                                                                                          | a.11.1            | Acyl-CoA binding protein                                                             | 7           | BOVIN, DROME, YEAST, SCHPO, RAT, HUMAN, MOUSE                      |
| Metabolism                                                                                                          | f.28.1            | Non-heme 11 kDa protein of cytochrome bc1 complex (Ubiquinol-cytochrome c reductase) | 6           | BOVIN, YEAST, SCHPO, RAT, HUMAN, MOUSE                             |
| Metabolism                                                                                                          | d.50.4            | Peptidyl-tRNA hydrolase domain-like                                                  | 6           | BOVIN, DROME, YEAST, ARATH, HUMAN, MOUSE                           |
| Metabolism                                                                                                          | b.74.1            | Carbonic anhydrase                                                                   | 5           | BOVIN, RAT, MOUSE, HUMAN, DROME                                    |
| Metabolism                                                                                                          | a.137.8           | Epsilon subunit of mitochondrial F1F0-ATP synthase                                   | 4           | SCHPO, MOUSE, HUMAN, YEAST                                         |
| Metabolism                                                                                                          | a.118.6           | Protein prenyltransferase                                                            | 2           | RAT, MOUSE                                                         |
| Regulation                                                                                                          | a.235.1           | ATP-dependent DNA ligase DNA-binding domain                                          | 10          | BOVIN, DROME, NEUCR, ARATH, SCHPO, TETTS, YEAST, RAT, HUMAN, MOUSE |
| Regulation                                                                                                          | b.55.1            | PH domain-like                                                                       | 9           | BOVIN, DROME, NEUCR, ARATH, SCHPO, YEAST, RAT, HUMAN, MOUSE        |
| Regulation                                                                                                          | a.59.1            | PAH2 domain                                                                          | 8           | BOVIN, DROME, YEAST, ARATH, SCHPO, RAT, HUMAN, MOUSE               |
| Regulation                                                                                                          | a.74.1            | Cyclin-like                                                                          | 8           | BOVIN, DROME, YEAST, ARATH, SCHPO, RAT, HUMAN, MOUSE               |
| Regulation                                                                                                          | g.37.1            | C2H2 and C2HC zinc fingers                                                           | 8           | BOVIN, DROME, NEUCR, ARATH, YEAST, RAT, HUMAN, MOUSE               |
| Regulation                                                                                                          | b.7.1             | C2 domain (Calcium/lipid-binding domain, CaLB)                                       | 8           | BOVIN, HUMAN, YEAST, ARATH, SCHPO, RAT, NEUCR, MOUSE               |
| Regulation                                                                                                          | b.34.2            | SH3-domain                                                                           | 8           | BOVIN, DROME, NEUCR, YEAST, SCHPO, RAT, HUMAN, MOUSE               |
| Regulation                                                                                                          | g.83.1            | Tim10-like                                                                           | 7           | BOVIN, DROME, YEAST, SCHPO, RAT, HUMAN, MOUSE                      |
| Regulation                                                                                                          | a.21.1            | HMG-box                                                                              | 7           | BOVIN, DROME, YEAST, SCHPO, RAT, HUMAN, MOUSE                      |
| Regulation                                                                                                          | a.22.1            | Histone-fold                                                                         | 6           | BOVIN, ARATH, SCHPO, RAT, HUMAN, MOUSE                             |
| Regulation                                                                                                          | a.140.2           | SAP domain                                                                           | 5           | BOVIN, MOUSE, HUMAN, DROME, YEAST                                  |
| Regulation                                                                                                          | a.69.2            | Ypt/Rab-GAP domain of gyp1p                                                          | 4           | BOVIN, MOUSE, HUMAN, YEAST                                         |
| Regulation                                                                                                          | a.117.1           | Ras GEF                                                                              | 4           | MOUSE, HUMAN, DROME, YEAST                                         |
| Regulation                                                                                                          | d.332.1           | RGC domain-like                                                                      | 3           | RAT, MOUSE, HUMAN                                                  |
| Regulation                                                                                                          | g.66.1            | CCCH zinc finger                                                                     | 3           | BOVIN, MOUSE, HUMAN                                                |
| Regulation                                                                                                          | a.66.1            | Transducin (alpha subunit), insertion domain                                         | 3           | RAT, MOUSE, HUMAN                                                  |
| Regulation                                                                                                          | a.116.1           | GTPase activation domain, GAP                                                        | 3           | RAT, MOUSE, HUMAN                                                  |
| Regulation                                                                                                          | d.93.1            | SH2 domain                                                                           | 3           | BOVIN, MOUSE, HUMAN                                                |
| Regulation                                                                                                          | g.85.1            | HIT/MYND zinc finger-like                                                            | 2           | TETTS, NEUCR                                                       |
| Regulation                                                                                                          | b.34.14           | PAZ domain                                                                           | 1           | DROME                                                              |

|                         |          |                                                                             |    |                                                                           |
|-------------------------|----------|-----------------------------------------------------------------------------|----|---------------------------------------------------------------------------|
| Regulation              | a.217.1  | Surp module (SWAP domain)                                                   | 1  | YEAST                                                                     |
| Regulation              | a.183.1  | Nop domain                                                                  | 1  | YEAST                                                                     |
| Regulation              | a.60.1   | SAM/Pointed domain                                                          | 1  | YEAST                                                                     |
| Regulation              | a.91.1   | Regulator of G-protein signaling, RGS                                       | 1  | HUMAN                                                                     |
| Regulation              | a.141.1  | Frizzled cysteine-rich domain                                               | 1  | HUMAN                                                                     |
| Regulation              | d.198.2  | Arp2/3 complex subunits                                                     | 1  | YEAST                                                                     |
| Intra-cellularProcesses | f.42.1   | Mitochondrial carrier                                                       | 11 | BOVIN, DROME, NEUCR, ARATH, SCHPO, TETTS, YEAST, RAT, HUMAN, PLAF7, MOUSE |
| Intra-cellularProcesses | d.25.1   | Mitochondrial glycoprotein MAM33-like                                       | 9  | BOVIN, DROME, NEUCR, ARATH, SCHPO, YEAST, RAT, HUMAN, MOUSE               |
| Intra-cellularProcesses | b.104.1  | P-domain of calnexin/calreticulin                                           | 9  | BOVIN, DROME, NEUCR, ARATH, SCHPO, YEAST, RAT, HUMAN, MOUSE               |
| Intra-cellularProcesses | b.2.7    | Second domain of Mu2 adaptin subunit (ap50) of ap2 adaptor                  | 9  | BOVIN, GIAIC, DROME, NEUCR, ARATH, SCHPO, RAT, HUMAN, MOUSE               |
| Intra-cellularProcesses | h.1.15   | SNARE fusion complex                                                        | 9  | BOVIN, DROME, NEUCR, ARATH, SCHPO, YEAST, RAT, HUMAN, MOUSE               |
| Intra-cellularProcesses | a.207.1  | Formin homology 2 domain (FH2 domain)                                       | 8  | BOVIN, DROME, NEUCR, ARATH, YEAST, RAT, HUMAN, MOUSE                      |
| Intra-cellularProcesses | b.64.1   | Mannose 6-phosphate receptor domain                                         | 8  | BOVIN, DROME, NEUCR, ARATH, SCHPO, RAT, HUMAN, MOUSE                      |
| Intra-cellularProcesses | g.12.1   | LDL receptor-like module                                                    | 8  | BOVIN, DROME, NEUCR, ARATH, SCHPO, RAT, HUMAN, MOUSE                      |
| Intra-cellularProcesses | h.1.26   | Myosin rod fragments                                                        | 7  | BOVIN, HUMAN, ARATH, SCHPO, RAT, NEUCR, MOUSE                             |
| Intra-cellularProcesses | a.64.1   | Saposin                                                                     | 6  | BOVIN, DROME, ARATH, RAT, HUMAN, MOUSE                                    |
| Intra-cellularProcesses | a.47.2   | t-snare proteins                                                            | 6  | BOVIN, ARATH, SCHPO, RAT, HUMAN, MOUSE                                    |
| Intra-cellularProcesses | d.109.1  | Actin depolymerizing proteins                                               | 5  | BOVIN, RAT, ARATH, MOUSE, HUMAN                                           |
| Intra-cellularProcesses | e.25.1   | Sec1/munc18-like (SM) proteins                                              | 5  | BOVIN, RAT, MOUSE, HUMAN, DROME                                           |
| Intra-cellularProcesses | d.110.1  | Profilin (actin-binding protein)                                            | 4  | BOVIN, RAT, MOUSE, HUMAN                                                  |
| Intra-cellularProcesses | a.2.5    | Prefoldin                                                                   | 4  | BOVIN, RAT, MOUSE, HUMAN                                                  |
| Intra-cellularProcesses | e.1.1    | Serpins                                                                     | 4  | BOVIN, RAT, MOUSE, HUMAN                                                  |
| Intra-cellularProcesses | b.1.10   | Clathrin adaptor appendage domain                                           | 4  | BOVIN, RAT, MOUSE, HUMAN                                                  |
| Intra-cellularProcesses | b.60.1   | Lipocalins                                                                  | 4  | BOVIN, RAT, MOUSE, HUMAN                                                  |
| Intra-cellularProcesses | d.105.1  | Subdomain of clathrin and coatomer appendage domain                         | 4  | BOVIN, RAT, MOUSE, HUMAN                                                  |
| Intra-cellularProcesses | c.8.4    | PA domain                                                                   | 3  | RAT, MOUSE, HUMAN                                                         |
| Intra-cellularProcesses | a.7.14   | MIT domain                                                                  | 2  | SCHPO, YEAST                                                              |
| Intra-cellularProcesses | b.69.5   | RCC1/BLIP-II                                                                | 1  | YEAST                                                                     |
| Intra-cellularProcesses | a.118.17 | Cullin repeat-like                                                          | 1  | YEAST                                                                     |
| Intra-cellularProcesses | e.40.1   | Cullin homology domain                                                      | 1  | YEAST                                                                     |
| Intra-cellularProcesses | a.14.1   | VHP, Villin headpiece domain                                                | 1  | ARATH                                                                     |
| Intra-cellularProcesses | c.10.3   | Outer arm dynein light chain 1                                              | 1  | DROME                                                                     |
| Intra-cellularProcesses | a.222.1  | VPS9 domain                                                                 | 1  | YEAST                                                                     |
| Extra-cellularProcesses | c.10.1   | RNI-like                                                                    | 8  | BOVIN, HUMAN, YEAST, ARATH, SCHPO, RAT, NEUCR, MOUSE                      |
| Extra-cellularProcesses | a.7.1    | Spectrin repeat                                                             | 6  | BOVIN, DROME, YEAST, RAT, HUMAN, MOUSE                                    |
| Extra-cellularProcesses | g.3.11   | EGF/Laminin                                                                 | 5  | BOVIN, RAT, MOUSE, HUMAN, DROME                                           |
| Extra-cellularProcesses | g.14.1   | Kringle-like                                                                | 2  | MOUSE, HUMAN                                                              |
| Extra-cellularProcesses | a.118.24 | Pseudo ankyrin repeat-like                                                  | 1  | NEUCR                                                                     |
| General                 | d.15.1   | Ubiquitin-like                                                              | 10 | BOVIN, DROME, NEUCR, ARATH, SCHPO, YEAST, RAT, HUMAN, PLAF7, MOUSE        |
| General                 | d.110.4  | SNARE-like                                                                  | 10 | BOVIN, GIAIC, DROME, NEUCR, ARATH, SCHPO, YEAST, RAT, HUMAN, MOUSE        |
| General                 | a.24.7   | FKBP12-rapamycin-binding domain of FKBP-rapamycin-associated protein (FRAP) | 9  | BOVIN, GIAIC, DROME, YEAST, ARATH, SCHPO, RAT, HUMAN, MOUSE               |
| General                 | d.31.1   | Cdc48 domain 2-like                                                         | 9  | BOVIN, DROME, YEAST, ARATH, SCHPO, RAT, HUMAN, PLAF7, MOUSE               |
| General                 | a.40.1   | Calponin-homology domain, CH-domain                                         | 9  | BOVIN, DROME, NEUCR, ARATH, SCHPO, YEAST, RAT, HUMAN, MOUSE               |
| General                 | a.189.1  | XPC-binding domain                                                          | 8  | BOVIN, HUMAN, YEAST, ARATH, SCHPO, RAT, NEUCR, MOUSE                      |
| General                 | a.118.7  | 14-3-3 protein                                                              | 8  | BOVIN, GIAIC, DROME, ARATH, SCHPO, RAT, HUMAN, MOUSE                      |
| General                 | g.41.2   | Microbial and mitochondrial ADK, insert "zinc finger" domain                | 6  | BOVIN, DROME, NEUCR, RAT, HUMAN, MOUSE                                    |
| General                 | a.158.1  | F-box domain                                                                | 6  | BOVIN, YEAST, ARATH, SCHPO, RAT, NEUCR                                    |
| General                 | d.42.1   | POZ domain                                                                  | 5  | BOVIN, RAT, MOUSE, HUMAN, YEAST                                           |
| General                 | c.10.2   | L domain-like                                                               | 4  | BOVIN, RAT, MOUSE, HUMAN                                                  |



|                                                                                                                           |          |                                                                                                 |    |                                                                    |
|---------------------------------------------------------------------------------------------------------------------------|----------|-------------------------------------------------------------------------------------------------|----|--------------------------------------------------------------------|
| General                                                                                                                   | a.238.1  | BAR/IMD domain-like                                                                             | 4  | SCHPO, NEUCR, HUMAN, YEAST                                         |
| General                                                                                                                   | d.289.1  | WWE domain                                                                                      | 1  | YEAST                                                              |
| Other                                                                                                                     | a.17.1   | Cysteine alpha-hairpin motif                                                                    | 7  | BOVIN, DROME, YEAST, SCHPO, RAT, HUMAN, MOUSE                      |
| Other                                                                                                                     | b.165.1  | MOSC N-terminal domain-like                                                                     | 5  | BOVIN, RAT, ARATH, MOUSE, HUMAN                                    |
| Other                                                                                                                     | a.71.1   | ERP29 C domain-like                                                                             | 5  | BOVIN, RAT, MOUSE, HUMAN, DROME                                    |
| Other                                                                                                                     | b.2.8    | beta-sandwich domain of Sec23/24                                                                | 5  | BOVIN, RAT, MOUSE, NEUCR, HUMAN                                    |
| Other                                                                                                                     | g.40.1   | Retrovirus zinc finger-like domains                                                             | 4  | BOVIN, ARATH, MOUSE, DROME                                         |
| Not Annotated                                                                                                             | a.289.1  |                                                                                                 | 10 | BOVIN, DROME, NEUCR, ARATH, SCHPO, YEAST, RAT, HUMAN, PLAF7, MOUSE |
| Not Annotated                                                                                                             | d.355.1  |                                                                                                 | 9  | BOVIN, DROME, YEAST, ARATH, SCHPO, RAT, HUMAN, PLAF7, MOUSE        |
| Not Annotated                                                                                                             | f.53.1   |                                                                                                 | 9  | BOVIN, DROME, NEUCR, ARATH, SCHPO, YEAST, RAT, HUMAN, MOUSE        |
| Not Annotated                                                                                                             | d.81.4   |                                                                                                 | 1  | ARATH                                                              |
| <b>55 mitochondria associated SFs which are species specific and do not have any known bacterial homologs as in fig 5</b> |          |                                                                                                 |    |                                                                    |
| Information                                                                                                               | d.75.1   | tRNA-intron endonuclease N-terminal domain-like                                                 | 1  | SCHPO                                                              |
| Information                                                                                                               | d.95.2   | Homing endonucleases                                                                            | 1  | YEAST                                                              |
| Metabolism                                                                                                                | a.118.11 | Cytochrome c oxidase subunit E                                                                  | 8  | BOVIN, DROME, NEUCR, YEAST, SCHPO, RAT, HUMAN, MOUSE               |
| Metabolism                                                                                                                | f.23.1   | Mitochondrial cytochrome c oxidase subunit IV                                                   | 8  | BOVIN, DROME, NEUCR, YEAST, SCHPO, RAT, HUMAN, MOUSE               |
| Metabolism                                                                                                                | b.34.8   | Fumarylacetoacetate hydrolase, FAH, N-terminal domain                                           | 7  | BOVIN, DROME, NEUCR, ARATH, RAT, HUMAN, MOUSE                      |
| Metabolism                                                                                                                | f.23.13  | Ubiquinone-binding protein QP-C of cytochrome bc1 complex (Ubiquinol-cytochrome c reductase)    | 7  | BOVIN, DROME, YEAST, SCHPO, RAT, HUMAN, MOUSE                      |
| Metabolism                                                                                                                | f.23.2   | Mitochondrial cytochrome c oxidase subunit VIa                                                  | 7  | BOVIN, DROME, YEAST, SCHPO, RAT, HUMAN, MOUSE                      |
| Metabolism                                                                                                                | f.23.14  | Subunit X (non-heme 7 kDa protein) of cytochrome bc1 complex (Ubiquinol-cytochrome c reductase) | 6  | BOVIN, YEAST, SCHPO, RAT, HUMAN, MOUSE                             |
| Metabolism                                                                                                                | f.23.6   | Mitochondrial cytochrome c oxidase subunit VIIc (aka VIIla)                                     | 6  | BOVIN, YEAST, SCHPO, RAT, HUMAN, MOUSE                             |
| Metabolism                                                                                                                | a.2.10   | Epsilon subunit of F1F0-ATP synthase C-terminal domain                                          | 5  | BOVIN, RAT, MOUSE, HUMAN, DROME                                    |
| Metabolism                                                                                                                | f.23.15  | Subunit XI (6.4 kDa protein) of cytochrome bc1 complex (Ubiquinol-cytochrome c reductase)       | 5  | BOVIN, RAT, MOUSE, HUMAN, YEAST                                    |
| Metabolism                                                                                                                | f.23.3   | Mitochondrial cytochrome c oxidase subunit VIc                                                  | 5  | BOVIN, RAT, SCHPO, MOUSE, HUMAN                                    |
| Metabolism                                                                                                                | h.4.8    | F1 ATPase inhibitor, IF1, C-terminal domain                                                     | 5  | BOVIN, RAT, MOUSE, HUMAN, YEAST                                    |
| Metabolism                                                                                                                | a.83.1   | Guanido kinase N-terminal domain                                                                | 4  | BOVIN, RAT, MOUSE, HUMAN                                           |
| Metabolism                                                                                                                | d.184.1  | Non-globular alpha+beta subunits of globular proteins                                           | 4  | BOVIN, RAT, MOUSE, HUMAN                                           |
| Metabolism                                                                                                                | f.23.4   | Mitochondrial cytochrome c oxidase subunit VIIa                                                 | 4  | BOVIN, RAT, MOUSE, HUMAN                                           |
| Metabolism                                                                                                                | f.23.5   | Mitochondrial cytochrome c oxidase subunit VIIb                                                 | 4  | BOVIN, RAT, MOUSE, HUMAN                                           |
| Metabolism                                                                                                                | d.36.1   | Chalcone isomerase                                                                              | 2  | SCHPO, YEAST                                                       |
| Metabolism                                                                                                                | a.191.1  | Methenyltetrahydrofolate cyclohydrolase-like                                                    | 1  | DROME                                                              |
| Regulation                                                                                                                | g.16.2   | Plexin repeat                                                                                   | 5  | BOVIN, RAT, MOUSE, HUMAN, DROME                                    |
| Regulation                                                                                                                | a.137.3  | Transducin (heterotrimeric G protein), gamma chain                                              | 4  | BOVIN, RAT, MOUSE, HUMAN                                           |
| Regulation                                                                                                                | a.7.4    | Smac/diablo                                                                                     | 4  | BOVIN, RAT, MOUSE, HUMAN                                           |
| Regulation                                                                                                                | d.170.1  | SRCR-like                                                                                       | 4  | BOVIN, RAT, MOUSE, HUMAN                                           |
| Regulation                                                                                                                | d.285.1  | DNA-binding domain of intron-encoded endonucleases                                              | 1  | NEUCR                                                              |
| Intra-cellularProcesses                                                                                                   | a.23.4   | Mitochondrial import receptor subunit Tom20                                                     | 8  | BOVIN, DROME, NEUCR, YEAST, SCHPO, RAT, HUMAN, MOUSE               |
| Intra-cellularProcesses                                                                                                   | b.61.5   | Dipeptidyl peptidase I (cathepsin C), exclusion domain                                          | 6  | BOVIN, GIAIC, RAT, HUMAN, PLAF7, MOUSE                             |
| Intra-cellularProcesses                                                                                                   | a.137.5  | Moesin tail domain                                                                              | 5  | BOVIN, RAT, MOUSE, HUMAN, DROME                                    |
| Intra-cellularProcesses                                                                                                   | a.65.1   | Annexin                                                                                         | 5  | BOVIN, RAT, MOUSE, HUMAN, DROME                                    |
| Intra-cellularProcesses                                                                                                   | f.1.4    | Bcl-2 inhibitors of programmed cell death                                                       | 4  | BOVIN, RAT, MOUSE, HUMAN                                           |
| Intra-cellularProcesses                                                                                                   | h.1.25   | Troponin coil-coiled subunits                                                                   | 4  | BOVIN, RAT, MOUSE, HUMAN                                           |
| Intra-cellularProcesses                                                                                                   | a.216.1  | I/LWEQ domain                                                                                   | 3  | RAT, MOUSE, HUMAN                                                  |
| Intra-cellularProcesses                                                                                                   | a.48.2   | Transferrin receptor-like dimerisation domain                                                   | 3  | RAT, MOUSE, HUMAN                                                  |
| Intra-cellularProcesses                                                                                                   | b.34.3   | Myosin S1 fragment, N-terminal domain                                                           | 3  | SCHPO, HUMAN, YEAST                                                |
| Intra-cellularProcesses                                                                                                   | f.36.1   | Neurotransmitter-gated ion-channel transmembrane pore                                           | 1  | MOUSE                                                              |

|                         |         |                                                   |   |                                                      |
|-------------------------|---------|---------------------------------------------------|---|------------------------------------------------------|
| Extra-cellularProcesses | b.1.15  | Integrin domains                                  | 5 | BOVIN, RAT, MOUSE, HUMAN, DROME                      |
| Extra-cellularProcesses | b.3.5   | Cna protein B-type domain                         | 5 | BOVIN, RAT, ARATH, MOUSE, HUMAN                      |
| Extra-cellularProcesses | d.200.1 | Integrin beta tail domain                         | 5 | BOVIN, RAT, MOUSE, HUMAN, DROME                      |
| Extra-cellularProcesses | b.1.1   | Immunoglobulin                                    | 4 | BOVIN, RAT, MOUSE, HUMAN                             |
| Extra-cellularProcesses | b.1.16  | Lamin A/C globular tail domain                    | 4 | BOVIN, RAT, MOUSE, HUMAN                             |
| Extra-cellularProcesses | d.171.1 | Fibrinogen C-terminal domain-like                 | 4 | BOVIN, RAT, MOUSE, HUMAN                             |
| Extra-cellularProcesses | g.18.1  | Complement control module/SCR domain              | 4 | BOVIN, RAT, MOUSE, HUMAN                             |
| Extra-cellularProcesses | a.215.1 | A middle domain of Talin 1                        | 3 | RAT, MOUSE, HUMAN                                    |
| Extra-cellularProcesses | a.24.9  | alpha-catenin/vinculin-like                       | 3 | RAT, MOUSE, HUMAN                                    |
| Extra-cellularProcesses | g.27.1  | Fnl-like domain                                   | 2 | MOUSE, HUMAN                                         |
| Extra-cellularProcesses | b.30.6  | V-region of surface antigen I/II (SA I/II, PAC)   | 1 | YEAST                                                |
| Extra-cellularProcesses | b.40.2  | Bacterial enterotoxins                            | 1 | MOUSE                                                |
| General                 | a.2.16  | Calcyclin-binding protein-like                    | 7 | BOVIN, DROME, ARATH, RAT, HUMAN, PLAF7, MOUSE        |
| General                 | a.126.1 | Serum albumin-like                                | 4 | BOVIN, RAT, MOUSE, HUMAN                             |
| General                 | f.45.1  | Mitochondrial ATP synthase coupling factor 6      | 4 | BOVIN, RAT, MOUSE, HUMAN                             |
| Other                   | h.1.20  | Intermediate filament protein, coiled coil region | 4 | BOVIN, RAT, MOUSE, HUMAN                             |
| Other                   | h.1.8   | Fibrinogen coiled-coil and central regions        | 4 | BOVIN, RAT, MOUSE, HUMAN                             |
| Other                   | e.34.1  | NSP3 homodimer                                    | 1 | SCHPO                                                |
| Other                   | h.4.10  | C-terminal domain of PLC-beta                     | 1 | HUMAN                                                |
| Not Annotated           | f.52.1  |                                                   | 8 | BOVIN, DROME, NEUCR, YEAST, SCHPO, RAT, HUMAN, MOUSE |
| Not Annotated           | d.382.1 |                                                   | 3 | SCHPO, MOUSE, HUMAN                                  |

Species legend:

ARATH:*A. thaliana*; BOVIN:*B. taurus*; DROME:*D. melanogaster*; GIAIC:*G. lamia*; HUMAN:*H. sapiens*; MOUSE:*M. musculus*; NEUCR:*N. crassa*; PLAF7:*P. falciparum*; RAT:*R. norvegicus*; SCHPO:*S. pombe*; TETTS:*T. thermophila*; YEAST:*S. cerevisiae*

## References

1. Gray KA, *et al.* (2013) Genenames.org: the HGNC resources in 2013. *Nucleic Acids Res.* 41, doi:10.1093/nar/gks1066.
2. Lomize MA, *et al.* (2006) OPM: Orientations of proteins in membranes database. *Bioinformatics* 22, 623–625.
3. Tanabe M, *et al.* (2012) Using the KEGG database resource. *Curr. Protoc. Bioinforma.*, doi:10.1002/0471250953.bi0112s38.
4. The UniProt Consortium. (2015) UniProt: a hub for protein information. *Nucleic Acids Res.* 43, D204–212.
5. Race HL, Herrman RG, Martin W (1999) Why have organelles retained genomes?. *Trends Genetics* 15, 364-70.
6. Hessa T, *et al.* (2007) Molecular code for transmembrane-helix recognition by the Sec61 translocon. *Nature* 450, 1026–1030.
7. He D, *et al.* (2014) An Alternative Root for the Eukaryote Tree of Life. *Curr Biol* 24(4):465-470.
8. Kannan S, Rogozin IB, & Koonin EV (2014) MitoCOGs: clusters of orthologous genes from mitochondria and implications for the evolution of eukaryotes. *BMC Evol Biol* 14(1):237.
9. Smith AC, Blackshaw JA, & Robinson AJ (2012) MitoMiner: a data warehouse for mitochondrial proteomics data. *Nucleic Acids Res* 40(D1):D1160-D1167.
10. Gough J, Karplus K, Hughey R, & Chothia C (2001) Assignment of homology to genome sequences using a library of hidden Markov models that represent all proteins of known structure. *J Mol Biol* 313(4):903-919.
11. Eddy SR (2011) Accelerated profile HMM searches. *PLoS Comput Biol* 7(10).
12. Vogel C, Berzuini C, Bashton M, Gough J, & Teichmann SA (2004) Supra-domains: Evolutionary Units Larger than Single Protein Domains. *J Mol Biol* 336(3):809-823.
13. Swofford DL (2003) *PAUP\**. *Phylogenetic Analysis Using Parsimony (\*and Other Methods)*. Version 4 (Sinauer Associates, Sunderland, Massachusetts).
14. Chothia C, Gough J, Vogel C, & Teichmann SA (2003) Evolution of the protein repertoire. *Science* 300(5626):1701-1703.
